# Supplementary material for: Identification of potential serum biomarkers of acute paraquat poisoning in humans using an iTRAQ quantitative proteomic
Source: PubMed Central journal article supplement (PMC9078879; doi:10.1039/c7ra12956d), 2018-03-16
Supplement: RA-008-C7RA12956D-s001.pdf [file RA-008-C7RA12956D-s001.pdf]

## Supplementary information

### Identification potential serum biomarkers of acute paraquat poisoning in humans using iTRAQ quantitative proteomic

Liming Wei<sup>2,3#</sup>, Yi Wang<sup>2#</sup>, Ling Lin<sup>2</sup>, Lei Zhang<sup>2</sup>, Yan Shi<sup>1</sup>, Ping Xiang<sup>1</sup>, Shujun Cao<sup>3</sup>, Min Shen<sup>1</sup>, Pengyuan Yang<sup>2</sup>

<sup>1</sup> Shanghai Key Laboratory of Forensic Medicine, Shanghai Forensic Service Platform, Institute of Forensic Science, Ministry of Justice, Shanghai, China

<sup>2</sup> Institutes of Biomedical Sciences & Department of Chemistry, Fudan University, Shanghai, China

<sup>3</sup> Shanghai Songjiang District Central Hospital, Shanghai, China.

#These authors contributed equally to this work. Correspondence and requests for materials should be addressed to P.Y. (email: pyyang@fudan.edu.cn), M.S. (email: shenm@ssfjd.cn) or S.C. (email: shujun-cao@163.com)

**Table S1.** Detailed clinical information of each cohort

|                                 | PQ poisoning patients | Healthy controls |
|---------------------------------|-----------------------|------------------|
| Sample size                     | 21                    | 21               |
| Sex (M/F)                       | 8/13                  | 10/11            |
| Age (year)                      | 35.5±12.3             | 32.5±8.5         |
| PQ plasma concentration (ug/mL) | 1.05±3.50             | No signal        |

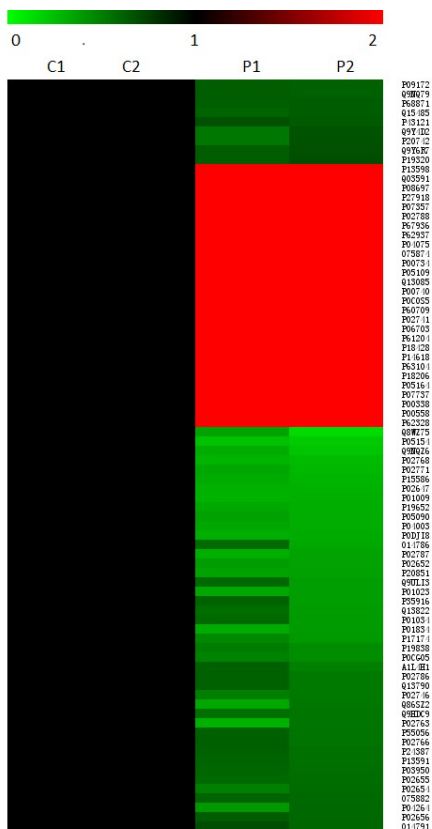

**Fig. S1.** Hierarchical clustering for differentially expressed proteins in PQ poisoning sample. Hierarchical clustering was performed with correlations on the proteins used to generate the heat map using the MultiExperiment Viewer. The proteins in clusters exhibit progressive up- or down-regulated patterns in PQ poisoning and were grouped into two representative clusters, Clusters 1-4. C1 and C2 represent two technical replicates of the iTRAQ-LC-MS/MS procedure from the healthy control cohort, while P1 and P2 represent two technical replicates from the cohort of PQ poisoning patients.

**Table S2.** A list of identified proteins (413 proteins) in combination of two technical replicates from PQ poisoning patients and healthy controls

| Accession | Description                                                       | Coverage | # Unique Peptides | # Peptides | # PSMs | 114/113      |
|-----------|-------------------------------------------------------------------|----------|-------------------|------------|--------|--------------|
| P62258    | 14-3-3 protein epsilon                                            | 10.59    | 1                 | 2          | 3      | 3.703        |
| P61981    | 14-3-3 protein gamma                                              | 10.93    | 1                 | 2          | 3      | 1.064        |
| P61981    | 14-3-3 protein gamma                                              | 8.91     | 1                 | 2          | 3      | 0.956        |
| P63104    | 14-3-3 protein zeta/delta                                         | 21.63    | 3                 | 4          | 6      | 2.446        |
| P63104    | 14-3-3 protein zeta/delta                                         | 21.63    | 3                 | 4          | 6      | 2.329        |
| Q9NRZ5    | 1-acyl-sn-glycerol-3-phosphate acyltransferase delta              | 1.85     | 1                 | 1          | 1      | 1.148        |
| P62191    | 26S protease regulatory subunit 4                                 | 2.05     | 1                 | 1          | 1      | 0.993        |
| Q3SYC2    | 2-acylglycerol                                                    | 2.69     | 1                 | 1          | 1      | 1.223        |
| P08253    | 72 kDa type IV collagenase                                        | 1.82     | 1                 | 1          | 1      | 0.536        |
| P11021    | 78 kDa glucose-regulated protein                                  | 7.03     | 3                 | 3          | 3      | 0.711        |
| P11021    | 78 kDa glucose-regulated protein                                  | 4.43     | 2                 | 2          | 2      | 0.759        |
| Q76LX8    | A disintegrin and metalloproteinase with thrombospondin motifs 13 | 2.31     | 3                 | 3          | 4      | 0.892        |
| Q76LX8    | A disintegrin and metalloproteinase with thrombospondin motifs 13 | 3.01     | 4                 | 4          | 6      | 1.218        |
| Q13085    | Acetyl-CoA carboxylase 1                                          | 0.30     | 1                 | 1          | 1      | 2.046        |
| Q13085    | Acetyl-CoA carboxylase 1                                          | 0.30     | 1                 | 1          | 3      | 1.843        |
| Q99798    | Aconitate hydratase, mitochondrial                                | 0.77     | 1                 | 1          | 1      | 1.001        |
| P60709    | Actin, cytoplasmic 1                                              | 26.67    | 9                 | 9          | 20     | 2.143        |
| P60709    | Actin, cytoplasmic 1                                              | 26.67    | 9                 | 9          | 18     | <b>2.058</b> |
| Q9NZK5    | Adenosine deaminase CECR1                                         | 1.57     | 1                 | 1          | 1      | 0.927        |
| Q01518    | Adenylyl cyclase-associated protein 1                             | 2.74     | 1                 | 1          | 1      | 0.936        |
| Q01518    | Adenylyl cyclase-associated protein 1                             | 2.74     | 1                 | 1          | 1      | 1.035        |
| Q9HDC9    | Adipocyte plasma membrane-associated protein                      | 1.68     | 1                 | 1          | 1      | 0.534        |
| Q9HDC9    | Adipocyte plasma membrane-associated protein                      | 1.68     | 1                 | 1          | 1      | 0.549        |
| Q15848    | Adiponectin                                                       | 6.15     | 1                 | 1          | 1      | 0.840        |
| Q15848    | Adiponectin                                                       | 6.15     | 1                 | 1          | 1      | 0.857        |
| P61204    | ADP-ribosylation factor 3                                         | 3.87     | 1                 | 1          | 1      | 2.182        |
| P61204    | ADP-ribosylation factor 3                                         | 3.87     | 1                 | 1          | 1      | 1.871        |
| P43652    | Afamin                                                            | 34.06    | 21                | 21         | 55     | 0.960        |
| P43652    | Afamin                                                            | 39.90    | 24                | 24         | 60     | 1.108        |
| Q13023    | A-kinase anchor protein 6                                         | 0.30     | 1                 | 1          | 1      | 1.029        |
| P02763    | Alpha-1-acid glycoprotein 1                                       | 15.92    | 2                 | 3          | 7      | 0.536        |
| P02763    | Alpha-1-acid glycoprotein 1                                       | 34.83    | 4                 | 6          | 10     | 0.302        |
| P19652    | Alpha-1-acid glycoprotein 2                                       | 16.42    | 2                 | 3          | 8      | 0.314        |
| P19652    | Alpha-1-acid glycoprotein 2                                       | 35.32    | 4                 | 6          | 10     | 0.334        |
| P01011    | Alpha-1-antichymotrypsin                                          | 34.28    | 14                | 14         | 74     | 1.043        |
| P01011    | Alpha-1-antichymotrypsin                                          | 35.93    | 15                | 15         | 87     | 1.134        |
| P01009    | Alpha-1-antitrypsin                                               | 53.83    | 20                | 20         | 98     | <b>0.307</b> |
| P01009    | Alpha-1-antitrypsin                                               | 53.83    | 22                | 22         | 102    | <b>0.297</b> |
| P04217    | Alpha-1B-glycoprotein                                             | 33.94    | 14                | 14         | 81     | 1.066        |
| P04217    | Alpha-1B-glycoprotein                                             | 33.94    | 14                | 14         | 101    | 1.077        |
| P08697    | Alpha-2-antiplasmin                                               | 24.64    | 11                | 11         | 23     | 1.614        |
| P08697    | Alpha-2-antiplasmin                                               | 27.29    | 10                | 10         | 27     | 1.610        |
| P02765    | Alpha-2-HS-glycoprotein                                           | 45.50    | 13                | 13         | 81     | 1.413        |

|        |                                                   |       |     |     |     |              |
|--------|---------------------------------------------------|-------|-----|-----|-----|--------------|
| P02765 | Alpha-2-HS-glycoprotein                           | 45.50 | 13  | 13  | 73  | 1.409        |
| P01023 | Alpha-2-macroglobulin                             | 25.31 | 25  | 29  | 47  | <b>0.378</b> |
| P01023 | Alpha-2-macroglobulin                             | 22.32 | 24  | 28  | 45  | <b>0.338</b> |
| P12814 | Alpha-actinin-1                                   | 2.58  | 2   | 2   | 3   | 1.418        |
| P12814 | Alpha-actinin-1                                   | 5.72  | 3   | 3   | 3   | 2.886        |
| P06733 | Alpha-enolase                                     | 1.84  | 1   | 1   | 1   | 1.124        |
| P06733 | Alpha-enolase                                     | 1.84  | 1   | 1   | 1   | 1.575        |
| P02771 | Alpha-fetoprotein                                 | 1.15  | 1   | 1   | 1   | 0.277        |
| P02771 | Alpha-fetoprotein                                 | 1.15  | 1   | 1   | 1   | 0.342        |
| Q16706 | Alpha-mannosidase 2                               | 0.61  | 1   | 1   | 1   | 1.533        |
| Q16706 | Alpha-mannosidase 2                               | 0.61  | 1   | 1   | 1   | 1.302        |
| Q03154 | Aminoacylase-1                                    | 1.96  | 1   | 1   | 1   | 0.744        |
| P15144 | Aminopeptidase N                                  | 3.31  | 3   | 3   | 3   | 0.738        |
| P15144 | Aminopeptidase N                                  | 0.93  | 1   | 1   | 1   | 0.792        |
| P05067 | Amyloid beta A4 protein                           | 1.56  | 1   | 1   | 1   | 0.741        |
| P03950 | Angiogenin                                        | 13.61 | 1   | 1   | 1   | 0.565        |
| P03950 | Angiogenin                                        | 13.61 | 1   | 1   | 1   | 0.598        |
| P12821 | Angiotensin-converting enzyme                     | 0.54  | 1   | 1   | 1   | 0.749        |
| P01019 | Angiotensinogen                                   | 19.79 | 9   | 9   | 33  | 1.255        |
| P01019 | Angiotensinogen                                   | 21.65 | 9   | 9   | 37  | 1.196        |
| Q8IWZ3 | Ankyrin repeat and KH domain-containing protein 1 | 0.39  | 1   | 1   | 1   | 1.062        |
| P12429 | Annexin A3                                        | 2.79  | 1   | 1   | 1   | 2.636        |
| P01008 | Antithrombin-III                                  | 44.83 | 23  | 23  | 82  | 1.393        |
| P01008 | Antithrombin-III                                  | 40.52 | 23  | 23  | 79  | 1.347        |
| P02647 | Apolipoprotein A-I                                | 66.29 | 18  | 18  | 111 | <b>0.299</b> |
| P02647 | Apolipoprotein A-I                                | 60.67 | 17  | 17  | 110 | <b>0.305</b> |
| P02652 | Apolipoprotein A-II                               | 62.00 | 5   | 5   | 19  | 0.354        |
| P02652 | Apolipoprotein A-II                               | 64.00 | 6   | 6   | 13  | 0.385        |
| P06727 | Apolipoprotein A-IV                               | 52.53 | 21  | 21  | 63  | 1.099        |
| P06727 | Apolipoprotein A-IV                               | 60.10 | 27  | 27  | 70  | 1.201        |
| P04114 | Apolipoprotein B-100                              | 41.62 | 167 | 167 | 460 | 0.940        |
| P04114 | Apolipoprotein B-100                              | 44.12 | 173 | 173 | 498 | 0.898        |
| P02654 | Apolipoprotein C-I                                | 30.12 | 3   | 3   | 4   | 0.573        |
| P02654 | Apolipoprotein C-I                                | 19.28 | 2   | 2   | 7   | 0.501        |
| P02655 | Apolipoprotein C-II                               | 49.50 | 4   | 4   | 6   | 0.571        |
| P02655 | Apolipoprotein C-II                               | 28.71 | 3   | 3   | 5   | 0.584        |
| P02656 | Apolipoprotein C-III                              | 27.27 | 2   | 2   | 10  | 0.592        |
| P02656 | Apolipoprotein C-III                              | 34.34 | 3   | 3   | 7   | 0.629        |
| P55056 | Apolipoprotein C-IV                               | 12.60 | 2   | 2   | 2   | 0.544        |
| P55056 | Apolipoprotein C-IV                               | 12.60 | 2   | 2   | 2   | 0.615        |
| P05090 | Apolipoprotein D                                  | 12.70 | 2   | 2   | 2   | 0.318        |
| P05090 | Apolipoprotein D                                  | 12.70 | 2   | 2   | 2   | 0.366        |
| P02649 | Apolipoprotein E                                  | 58.99 | 16  | 16  | 33  | 0.922        |
| P02649 | Apolipoprotein E                                  | 63.41 | 19  | 19  | 39  | 0.933        |
| Q13790 | Apolipoprotein F                                  | 8.28  | 2   | 2   | 3   | 0.521        |
| Q13790 | Apolipoprotein F                                  | 8.28  | 2   | 2   | 4   | 0.619        |
| O14791 | Apolipoprotein L1                                 | 22.11 | 6   | 6   | 7   | 0.599        |
| O14791 | Apolipoprotein L1                                 | 16.58 | 5   | 5   | 5   | 0.687        |
| O95445 | Apolipoprotein M                                  | 15.96 | 3   | 3   | 5   | 0.873        |
| O95445 | Apolipoprotein M                                  | 12.23 | 2   | 2   | 3   | 0.909        |
| P08519 | Apolipoprotein(a)                                 | 7.50  | 2   | 3   | 6   | 2.631        |
| P08519 | Apolipoprotein(a)                                 | 7.15  | 1   | 2   | 5   | 1.727        |
| P17174 | Aspartate aminotransferase, cytoplasmic           | 2.18  | 1   | 1   | 1   | 0.393        |

|        |                                                                      |       |    |    |    |       |
|--------|----------------------------------------------------------------------|-------|----|----|----|-------|
| P17174 | Aspartate aminotransferase, cytoplasmic                              | 2.18  | 1  | 1  | 1  | 0.466 |
| O75882 | Attractin                                                            | 8.33  | 9  | 9  | 12 | 0.584 |
| O75882 | Attractin                                                            | 5.95  | 8  | 8  | 13 | 0.603 |
| O14645 | Axonemal dynein light intermediate polypeptide 1                     | 2.33  | 1  | 1  | 1  | 0.548 |
| P20160 | Azurocidin                                                           | 3.98  | 1  | 1  | 1  | 0.823 |
| P98160 | Basement membrane-specific heparan sulfate proteoglycan core protein | 0.48  | 2  | 2  | 2  | 0.440 |
| P98160 | Basement membrane-specific heparan sulfate proteoglycan core protein | 0.43  | 2  | 2  | 2  | 0.903 |
| O43286 | Beta-1,4-galactosyltransferase 5                                     | 2.06  | 1  | 1  | 1  |       |
| P02749 | Beta-2-glycoprotein 1                                                | 45.80 | 12 | 12 | 27 | 1.509 |
| P02749 | Beta-2-glycoprotein 1                                                | 36.52 | 12 | 12 | 33 | 1.406 |
| P61769 | Beta-2-microglobulin                                                 | 16.81 | 2  | 2  | 2  | 0.640 |
| P61769 | Beta-2-microglobulin                                                 | 35.29 | 3  | 3  | 3  | 0.696 |
| Q96KN2 | Beta-Ala-His dipeptidase                                             | 10.26 | 5  | 5  | 6  | 0.844 |
| Q96KN2 | Beta-Ala-His dipeptidase                                             | 15.58 | 7  | 7  | 10 | 1.012 |
| P43251 | Biotinidase                                                          | 13.26 | 6  | 6  | 11 | 1.036 |
| P43251 | Biotinidase                                                          | 10.68 | 5  | 5  | 11 | 1.292 |
| P13727 | Bone marrow proteoglycan                                             | 8.11  | 1  | 1  | 1  | 1.323 |
| P13727 | Bone marrow proteoglycan                                             | 8.11  | 1  | 1  | 1  | 0.583 |
| P04003 | C4b-binding protein alpha chain                                      | 11.89 | 7  | 7  | 13 | 0.320 |
| P04003 | C4b-binding protein alpha chain                                      | 14.57 | 9  | 9  | 12 | 0.342 |
| P20851 | C4b-binding protein beta chain                                       | 3.57  | 1  | 1  | 2  | 0.365 |
| P20851 | C4b-binding protein beta chain                                       | 3.57  | 1  | 1  | 1  | 0.355 |
| P12830 | Cadherin-1                                                           | 1.59  | 1  | 1  | 1  | 0.656 |
| P12830 | Cadherin-1                                                           | 1.59  | 1  | 1  | 1  | 0.683 |
| P55290 | Cadherin-13                                                          | 3.65  | 2  | 2  | 3  | 0.889 |
| P55290 | Cadherin-13                                                          | 6.87  | 4  | 4  | 5  | 0.660 |
| P33151 | Cadherin-5                                                           | 1.66  | 1  | 1  | 1  | 1.275 |
| P33151 | Cadherin-5                                                           | 2.68  | 2  | 2  | 2  | 1.130 |
| Q9BYE9 | Cadherin-related family member 2                                     | 0.99  | 1  | 1  | 1  | 0.663 |
| P62158 | Calmodulin                                                           | 6.04  | 1  | 1  | 1  | 1.428 |
| Q99439 | Calponin-2                                                           | 5.50  | 1  | 1  | 1  | 0.676 |
| P27797 | Calreticulin                                                         | 2.88  | 1  | 1  | 1  | 1.168 |
| P00915 | Carbonic anhydrase 1                                                 | 9.96  | 3  | 3  | 6  | 1.405 |
| P00915 | Carbonic anhydrase 1                                                 | 9.96  | 3  | 3  | 6  | 1.190 |
| P00918 | Carbonic anhydrase 2                                                 | 3.46  | 1  | 1  | 1  | 1.404 |
| Q96IY4 | Carboxypeptidase B2                                                  | 19.15 | 9  | 9  | 17 | 1.140 |
| Q96IY4 | Carboxypeptidase B2                                                  | 13.71 | 6  | 6  | 12 | 1.056 |
| P15169 | Carboxypeptidase N catalytic chain                                   | 18.56 | 8  | 8  | 11 | 0.929 |
| P15169 | Carboxypeptidase N catalytic chain                                   | 14.85 | 6  | 6  | 9  | 1.211 |
| P22792 | Carboxypeptidase N subunit 2                                         | 23.49 | 11 | 11 | 18 | 1.366 |
| P22792 | Carboxypeptidase N subunit 2                                         | 23.49 | 11 | 11 | 17 | 1.503 |
| Q9Y646 | Carboxypeptidase Q                                                   | 1.91  | 1  | 1  | 1  | 0.724 |
| Q9Y646 | Carboxypeptidase Q                                                   | 4.24  | 2  | 2  | 2  | 0.679 |
| P31997 | Carcinoembryonic antigen-related cell adhesion molecule 8            | 2.58  | 1  | 1  | 1  | 1.301 |
| Q9NQ79 | Cartilage acidic protein 1                                           | 5.14  | 2  | 2  | 2  | 0.615 |
| Q9NQ79 | Cartilage acidic protein 1                                           | 2.87  | 2  | 2  | 2  | 0.632 |
| P49747 | Cartilage oligomeric matrix protein                                  | 6.08  | 4  | 4  | 4  | 0.825 |
| P49747 | Cartilage oligomeric matrix protein                                  | 3.96  | 3  | 3  | 3  | 0.694 |
| P04040 | Catalase                                                             | 10.06 | 4  | 4  | 4  | 1.089 |
| P04040 | Catalase                                                             | 13.85 | 6  | 6  | 6  | 1.060 |

|        |                                                 |       |    |    |     |       |
|--------|-------------------------------------------------|-------|----|----|-----|-------|
| P08311 | Cathepsin G                                     | 3.53  | 1  | 1  | 1   | 1.195 |
| P08311 | Cathepsin G                                     | 3.53  | 1  | 1  | 1   | 1.635 |
| Q9UBR2 | Cathepsin Z                                     | 3.96  | 1  | 1  | 1   | 1.005 |
| P11717 | Cation-independent mannose-6-phosphate receptor | 0.28  | 1  | 1  | 1   | 0.974 |
| Q6YHK3 | CD109 antigen                                   | 0.69  | 1  | 1  | 1   | 1.152 |
| Q6YHK3 | CD109 antigen                                   | 1.66  | 2  | 2  | 2   | 1.164 |
| P16070 | CD44 antigen                                    | 2.83  | 2  | 2  | 4   | 1.417 |
| P16070 | CD44 antigen                                    | 2.83  | 2  | 2  | 4   | 1.499 |
| O43866 | CD5 antigen-like                                | 2.02  | 1  | 1  | 2   | 1.052 |
| O43866 | CD5 antigen-like                                | 2.02  | 1  | 1  | 1   | 1.372 |
| P43121 | Cell surface glycoprotein MUC18                 | 5.88  | 3  | 3  | 3   | 0.640 |
| P43121 | Cell surface glycoprotein MUC18                 | 1.39  | 1  | 1  | 1   | 0.675 |
| P00450 | Ceruloplasmin                                   | 38.12 | 35 | 35 | 124 | 1.202 |
| P00450 | Ceruloplasmin                                   | 39.62 | 35 | 35 | 122 | 1.361 |
| Q96FZ7 | Charged multivesicular body protein 6           | 2.99  | 1  | 1  | 1   | 2.269 |
| O00299 | Chloride intracellular channel protein 1        | 3.73  | 1  | 1  | 1   | 2.615 |
| P06276 | Cholinesterase                                  | 15.61 | 8  | 8  | 11  | 1.294 |
| P06276 | Cholinesterase                                  | 16.61 | 9  | 9  | 13  | 1.042 |
| Q99895 | Chymotrypsin-C                                  | 2.61  | 1  | 1  | 1   | 0.932 |
| Q99895 | Chymotrypsin-C                                  | 2.61  | 1  | 1  | 1   | 0.986 |
| P10909 | Clusterin                                       | 23.83 | 9  | 9  | 23  | 1.440 |
| P10909 | Clusterin                                       | 23.83 | 9  | 9  | 32  | 1.241 |
| P00740 | Coagulation factor IX                           | 6.94  | 3  | 3  | 4   | 2.048 |
| P00740 | Coagulation factor IX                           | 8.68  | 4  | 4  | 5   | 1.734 |
| P12259 | Coagulation factor V                            | 4.99  | 12 | 12 | 15  | 0.931 |
| P12259 | Coagulation factor V                            | 5.58  | 13 | 13 | 14  | 0.960 |
| P08709 | Coagulation factor VII                          | 4.94  | 1  | 1  | 1   | 0.523 |
| P08709 | Coagulation factor VII                          | 2.15  | 1  | 1  | 1   | 0.779 |
| P00742 | Coagulation factor X                            | 16.19 | 6  | 6  | 8   | 1.009 |
| P00742 | Coagulation factor X                            | 16.19 | 6  | 6  | 8   | 1.217 |
| P03951 | Coagulation factor XI                           | 15.04 | 9  | 9  | 12  | 1.310 |
| P03951 | Coagulation factor XI                           | 18.88 | 11 | 11 | 15  | 1.399 |
| P00748 | Coagulation factor XII                          | 19.67 | 11 | 11 | 16  | 0.962 |
| P00748 | Coagulation factor XII                          | 24.07 | 13 | 13 | 18  | 1.201 |
| P00488 | Coagulation factor XIII A chain                 | 10.38 | 6  | 6  | 6   | 1.306 |
| P00488 | Coagulation factor XIII A chain                 | 3.83  | 2  | 2  | 2   | 1.745 |
| P05160 | Coagulation factor XIII B chain                 | 16.34 | 8  | 8  | 13  | 0.923 |
| P05160 | Coagulation factor XIII B chain                 | 17.10 | 9  | 9  | 13  | 1.068 |
| P23528 | Cofilin-1                                       | 20.48 | 2  | 2  | 2   | 1.363 |
| Q96EE4 | Coiled-coil domain-containing protein 126       | 8.57  | 1  | 1  | 2   | 1.448 |
| P12109 | Collagen alpha-1(VI) chain                      | 0.88  | 1  | 1  | 1   | 0.870 |
| P39060 | Collagen alpha-1(XVIII) chain                   | 0.97  | 1  | 1  | 1   | 0.870 |
| P39060 | Collagen alpha-1(XVIII) chain                   | 1.48  | 2  | 2  | 2   | 0.905 |
| P12110 | Collagen alpha-2(VI) chain                      | 0.88  | 1  | 1  | 1   | 0.776 |
| P12111 | Collagen alpha-3(VI) chain                      | 1.57  | 4  | 4  | 4   | 0.763 |
| P12111 | Collagen alpha-3(VI) chain                      | 1.29  | 4  | 4  | 4   | 0.768 |
| Q9Y6Z7 | Collectin-10                                    | 3.61  | 1  | 1  | 1   | 1.071 |
| Q9BWP8 | Collectin-11                                    | 4.06  | 1  | 1  | 1   | 1.340 |
| Q9BWP8 | Collectin-11                                    | 3.69  | 1  | 1  | 1   | 1.070 |
| P02745 | Complement C1q subcomponent subunit A           | 13.47 | 2  | 2  | 3   | 0.986 |
| P02745 | Complement C1q subcomponent subunit A           | 4.08  | 1  | 1  | 1   | 1.038 |
| P02746 | Complement C1q subcomponent subunit B           | 8.70  | 2  | 2  | 5   | 0.525 |
| P02746 | Complement C1q subcomponent subunit B           | 8.70  | 3  | 3  | 6   | 0.500 |

|        |                                                |       |    |    |     |       |
|--------|------------------------------------------------|-------|----|----|-----|-------|
| P02747 | Complement C1q subcomponent subunit C          | 25.31 | 5  | 5  | 9   | 0.771 |
| P02747 | Complement C1q subcomponent subunit C          | 25.31 | 5  | 5  | 10  | 0.891 |
| P00736 | Complement C1r subcomponent                    | 28.94 | 13 | 15 | 24  | 1.419 |
| P00736 | Complement C1r subcomponent                    | 28.79 | 16 | 17 | 28  | 1.309 |
| Q9NZP8 | Complement C1r subcomponent-like protein       | 10.68 | 4  | 6  | 8   | 1.296 |
| Q9NZP8 | Complement C1r subcomponent-like protein       | 8.62  | 4  | 5  | 7   | 0.803 |
| P09871 | Complement C1s subcomponent                    | 22.53 | 11 | 12 | 20  | 0.833 |
| P09871 | Complement C1s subcomponent                    | 23.98 | 11 | 12 | 21  | 0.908 |
| P06681 | Complement C2                                  | 23.40 | 19 | 19 | 37  | 1.011 |
| P06681 | Complement C2                                  | 21.01 | 16 | 16 | 42  | 0.841 |
| P01024 | Complement C3                                  | 19.18 | 28 | 28 | 47  | 1.388 |
| P01024 | Complement C3                                  | 18.88 | 29 | 29 | 49  | 1.410 |
| P0C0L4 | Complement C4-A                                | 44.15 | 3  | 74 | 266 | 1.369 |
| P0C0L4 | Complement C4-A                                | 44.67 | 3  | 72 | 276 | 1.366 |
| P0C0L5 | Complement C4-B                                | 43.92 | 3  | 74 | 268 | 0.793 |
| P0C0L5 | Complement C4-B                                | 45.13 | 4  | 73 | 278 | 0.767 |
| P01031 | Complement C5                                  | 24.11 | 42 | 42 | 84  | 0.965 |
| P01031 | Complement C5                                  | 26.13 | 44 | 44 | 85  | 0.912 |
| Q9NPY3 | Complement component C1q receptor              | 1.07  | 1  | 1  | 1   | 0.992 |
| P13671 | Complement component C6                        | 21.73 | 19 | 19 | 41  | 1.430 |
| P13671 | Complement component C6                        | 22.48 | 20 | 20 | 47  | 1.202 |
| P10643 | Complement component C7                        | 22.89 | 18 | 18 | 38  | 0.992 |
| P10643 | Complement component C7                        | 17.91 | 15 | 15 | 38  | 0.974 |
| P07357 | Complement component C8 alpha chain            | 19.52 | 9  | 9  | 14  | 1.717 |
| P07357 | Complement component C8 alpha chain            | 21.06 | 10 | 10 | 11  | 1.497 |
| P07358 | Complement component C8 beta chain             | 25.38 | 15 | 15 | 27  | 1.054 |
| P07358 | Complement component C8 beta chain             | 22.17 | 13 | 13 | 22  | 1.094 |
| P07360 | Complement component C8 gamma chain            | 58.42 | 9  | 9  | 16  | 1.275 |
| P07360 | Complement component C8 gamma chain            | 50.50 | 8  | 8  | 14  | 1.283 |
| P02748 | Complement component C9                        | 28.98 | 16 | 16 | 36  | 1.383 |
| P02748 | Complement component C9                        | 32.74 | 18 | 18 | 43  | 1.355 |
| P00751 | Complement factor B                            | 41.88 | 33 | 33 | 95  | 1.296 |
| P00751 | Complement factor B                            | 40.84 | 31 | 31 | 96  | 1.243 |
| P00746 | Complement factor D                            | 15.42 | 3  | 3  | 4   | 0.893 |
| P00746 | Complement factor D                            | 19.76 | 3  | 3  | 4   | 0.786 |
| P08603 | Complement factor H                            | 41.75 | 41 | 44 | 108 | 1.165 |
| P08603 | Complement factor H                            | 40.21 | 38 | 42 | 102 | 1.125 |
| Q03591 | Complement factor H-related protein 1          | 21.82 | 2  | 7  | 14  | 1.584 |
| Q03591 | Complement factor H-related protein 1          | 25.15 | 2  | 8  | 15  | 1.460 |
| P36980 | Complement factor H-related protein 2          | 23.33 | 3  | 6  | 10  | 1.799 |
| P36980 | Complement factor H-related protein 2          | 23.33 | 3  | 6  | 10  | 1.260 |
| P05156 | Complement factor I                            | 20.24 | 10 | 10 | 18  | 1.294 |
| P05156 | Complement factor I                            | 18.18 | 9  | 9  | 17  | 1.216 |
| Q12860 | Contactin-1                                    | 0.98  | 1  | 1  | 1   | 0.740 |
| P08185 | Corticosteroid-binding globulin                | 22.22 | 7  | 7  | 18  | 0.718 |
| P08185 | Corticosteroid-binding globulin                | 14.32 | 5  | 5  | 17  | 0.837 |
| P24387 | Corticotropin-releasing factor-binding protein | 3.11  | 1  | 1  | 1   | 0.554 |
| P24387 | Corticotropin-releasing factor-binding protein | 3.11  | 1  | 1  | 1   | 0.616 |
| Q9P1F3 | Costars family protein ABRACL                  | 16.05 | 1  | 1  | 1   | 1.697 |
| P02741 | C-reactive protein                             | 20.98 | 5  | 5  | 13  | 2.167 |
| P02741 | C-reactive protein                             | 24.11 | 6  | 6  | 14  | 2.250 |
| Q9UBG0 | C-type mannose receptor 2                      | 0.88  | 1  | 1  | 1   | 1.030 |
| P01034 | Cystatin-C                                     | 7.53  | 1  | 1  | 1   | 0.389 |
| P01034 | Cystatin-C                                     | 7.53  | 1  | 1  | 1   | 0.588 |

|        |                                                                  |       |    |    |    |       |
|--------|------------------------------------------------------------------|-------|----|----|----|-------|
| P54108 | Cysteine-rich secretory protein 3                                | 6.53  | 2  | 2  | 3  | 1.357 |
| P54108 | Cysteine-rich secretory protein 3                                | 3.27  | 1  | 1  | 2  | 1.090 |
| Q07065 | Cytoskeleton-associated protein 4                                | 1.16  | 1  | 1  | 1  | 0.528 |
| P81605 | Dermcidin                                                        | 10.00 | 1  | 1  | 1  | 0.843 |
| P81605 | Dermcidin                                                        | 10.00 | 1  | 1  | 1  | 0.736 |
| Q14126 | Desmoglein-2                                                     | 0.89  | 1  | 1  | 1  | 1.111 |
| Q14126 | Desmoglein-2                                                     | 0.89  | 1  | 1  | 1  | 1.075 |
| Q01459 | Di-N-acetylchitobiase                                            | 5.97  | 2  | 2  | 2  | 0.695 |
| Q01459 | Di-N-acetylchitobiase                                            | 5.97  | 2  | 2  | 2  | 0.835 |
| Q9H4A9 | Dipeptidase 2                                                    | 2.06  | 1  | 1  | 1  | 1.000 |
| Q9H4A9 | Dipeptidase 2                                                    | 2.06  | 1  | 1  | 1  | 0.731 |
| P27487 | Dipeptidyl peptidase 4                                           | 6.79  | 4  | 4  | 4  | 1.171 |
| P27487 | Dipeptidyl peptidase 4                                           | 4.05  | 3  | 3  | 3  | 1.460 |
| P09172 | Dopamine beta-hydroxylase                                        | 5.35  | 3  | 3  | 7  | 0.612 |
| P09172 | Dopamine beta-hydroxylase                                        | 6.16  | 4  | 4  | 9  | 0.629 |
| Q96L15 | Ecto-ADP-ribosyltransferase 5                                    | 2.06  | 1  | 1  | 1  |       |
| Q96L15 | Ecto-ADP-ribosyltransferase 5                                    | 2.06  | 1  | 1  | 1  |       |
| Q13822 | Ectonucleotide pyrophosphatase/phosphodiesterase family member 2 | 2.67  | 1  | 1  | 1  | 0.386 |
| Q13822 | Ectonucleotide pyrophosphatase/phosphodiesterase family member 2 | 6.49  | 4  | 4  | 4  | 0.565 |
| Q12805 | EGF-containing fibulin-like extracellular matrix protein 1       | 4.67  | 1  | 1  | 1  | 1.519 |
| Q7Z222 | Elongation factor Tu GTP-binding domain-containing protein 1     | 0.63  | 1  | 1  | 1  | 0.309 |
| Q9NZ08 | Endoplasmic reticulum aminopeptidase 1                           | 1.38  | 1  | 1  | 1  | 1.206 |
| Q9NZ08 | Endoplasmic reticulum aminopeptidase 1                           | 1.49  | 1  | 1  | 1  | 0.655 |
| Q6P179 | Endoplasmic reticulum aminopeptidase 2                           | 1.35  | 1  | 1  | 1  | 0.927 |
| P14625 | Endoplasmic reticulum chaperone protein                          | 1.37  | 1  | 1  | 1  | 0.303 |
| Q9UNN8 | Endothelial protein C receptor                                   | 3.78  | 1  | 1  | 1  | 0.630 |
| Q9UNN8 | Endothelial protein C receptor                                   | 3.78  | 1  | 1  | 1  | 0.711 |
| Q9UBQ6 | Exostosin-like 2                                                 | 2.12  | 1  | 1  | 1  | 0.938 |
| Q9UBQ6 | Exostosin-like 2                                                 | 2.12  | 1  | 1  | 1  | 1.018 |
| Q16610 | Extracellular matrix protein 1                                   | 17.78 | 8  | 8  | 10 | 1.131 |
| Q16610 | Extracellular matrix protein 1                                   | 13.33 | 7  | 7  | 9  | 1.552 |
| Q8IXL6 | Extracellular serine/threonine protein kinase FAM20C             | 1.20  | 1  | 1  | 1  | 0.903 |
| P08294 | Extracellular superoxide dismutase [Cu-Zn]                       | 8.75  | 2  | 2  | 2  | 0.998 |
| P08294 | Extracellular superoxide dismutase [Cu-Zn]                       | 3.33  | 1  | 1  | 1  | 2.486 |
| Q96AE4 | Far upstream element-binding protein 1                           | 1.09  | 1  | 1  | 1  | 2.456 |
| Q86UX7 | Fermitin family homolog 3                                        | 6.00  | 3  | 3  | 4  | 3.104 |
| Q86UX7 | Fermitin family homolog 3                                        | 8.25  | 5  | 5  | 6  | 2.186 |
| Q9UGM5 | Fetuin-B                                                         | 18.32 | 6  | 6  | 9  | 1.219 |
| Q9UGM5 | Fetuin-B                                                         | 21.73 | 6  | 6  | 7  | 1.126 |
| P02671 | Fibrinogen alpha chain                                           | 12.47 | 9  | 9  | 23 | 0.876 |
| P02671 | Fibrinogen alpha chain                                           | 13.39 | 10 | 10 | 16 | 1.155 |
| P02675 | Fibrinogen beta chain                                            | 6.92  | 4  | 4  | 4  | 0.880 |
| P02675 | Fibrinogen beta chain                                            | 9.16  | 6  | 6  | 7  | 1.174 |
| P02679 | Fibrinogen gamma chain                                           | 1.99  | 1  | 1  | 1  | 0.803 |
| P02679 | Fibrinogen gamma chain                                           | 1.99  | 1  | 1  | 1  | 0.947 |
| P02751 | Fibronectin                                                      | 8.21  | 15 | 15 | 21 | 1.040 |
| P02751 | Fibronectin                                                      | 9.51  | 17 | 17 | 23 | 1.320 |



|        |                                                  |       |    |    |     |       |
|--------|--------------------------------------------------|-------|----|----|-----|-------|
| P23142 | Fibulin-1                                        | 6.97  | 4  | 4  | 6   | 1.233 |
| P23142 | Fibulin-1                                        | 8.39  | 5  | 5  | 5   | 1.173 |
| Q15485 | Ficolin-2                                        | 5.11  | 2  | 2  | 2   | 0.639 |
| Q15485 | Ficolin-2                                        | 2.88  | 1  | 1  | 2   | 0.603 |
| O75636 | Ficolin-3                                        | 34.11 | 10 | 10 | 24  | 0.920 |
| O75636 | Ficolin-3                                        | 28.76 | 8  | 8  | 20  | 0.922 |
| P21333 | Filamin-A                                        | 0.53  | 1  | 1  | 1   | 1.079 |
| P30043 | Flavin reductase (NADPH)                         | 7.28  | 1  | 1  | 2   | 1.854 |
| P30043 | Flavin reductase (NADPH)                         | 7.28  | 1  | 1  | 2   | 0.820 |
| B1AJZ9 | Forkhead-associated domain-containing protein 1  | 1.49  | 1  | 1  | 1   | 0.608 |
| P04075 | Fructose-bisphosphate aldolase A                 | 2.20  | 1  | 1  | 1   | 1.970 |
| P04075 | Fructose-bisphosphate aldolase A                 | 6.59  | 2  | 3  | 3   | 1.815 |
| P05062 | Fructose-bisphosphate aldolase B                 | 7.14  | 2  | 2  | 2   | 1.305 |
| P05062 | Fructose-bisphosphate aldolase B                 | 9.07  | 2  | 3  | 3   | 1.307 |
| P16930 | Fumarylacetoacetase                              | 3.10  | 1  | 1  | 1   | 1.608 |
| P16930 | Fumarylacetoacetase                              | 10.26 | 4  | 4  | 4   | 0.661 |
| Q08380 | Galectin-3-binding protein                       | 10.26 | 5  | 5  | 5   | 1.074 |
| Q08380 | Galectin-3-binding protein                       | 10.26 | 5  | 5  | 7   | 0.870 |
| Q92820 | Gamma-glutamyl hydrolase                         | 9.12  | 2  | 2  | 3   | 1.213 |
| Q92820 | Gamma-glutamyl hydrolase                         | 4.40  | 1  | 1  | 1   | 0.775 |
| P06396 | Gelsolin                                         | 32.86 | 23 | 23 | 43  | 1.017 |
| P06396 | Gelsolin                                         | 37.85 | 24 | 24 | 49  | 1.008 |
| P06744 | Glucose-6-phosphate isomerase                    | 1.43  | 1  | 1  | 1   | 0.530 |
| Q07075 | Glutamyl aminopeptidase                          | 1.36  | 1  | 1  | 1   | 0.721 |
| P22352 | Glutathione peroxidase 3                         | 15.93 | 3  | 3  | 5   | 0.763 |
| P22352 | Glutathione peroxidase 3                         | 15.93 | 3  | 3  | 6   | 0.845 |
| P48637 | Glutathione synthetase                           | 3.59  | 1  | 1  | 1   | 0.310 |
| Q9H583 | HEAT repeat-containing protein 1                 | 0.37  | 1  | 1  | 1   | 0.453 |
| P08107 | Heat shock 70 kDa protein 1A/1B                  | 3.90  | 1  | 2  | 2   | 1.575 |
| P11142 | Heat shock cognate 71 kDa protein                | 6.97  | 2  | 3  | 3   | 2.489 |
| P69905 | Hemoglobin subunit alpha                         | 8.45  | 1  | 1  | 1   | 0.741 |
| P68871 | Hemoglobin subunit beta                          | 27.89 | 4  | 4  | 5   | 0.639 |
| P68871 | Hemoglobin subunit beta                          | 27.89 | 4  | 4  | 7   | 0.625 |
| P02790 | Hemopexin                                        | 52.81 | 21 | 21 | 118 | 0.858 |
| P02790 | Hemopexin                                        | 62.12 | 23 | 23 | 134 | 0.926 |
| P05546 | Heparin cofactor 2                               | 18.24 | 11 | 11 | 28  | 1.143 |
| P05546 | Heparin cofactor 2                               | 26.65 | 15 | 15 | 42  | 1.178 |
| Q04756 | Hepatocyte growth factor activator               | 9.01  | 5  | 5  | 7   | 1.353 |
| Q04756 | Hepatocyte growth factor activator               | 10.69 | 6  | 6  | 8   | 1.436 |
| P08581 | Hepatocyte growth factor receptor                | 0.65  | 1  | 1  | 1   | 0.716 |
| P26927 | Hepatocyte growth factor-like protein            | 5.63  | 4  | 4  | 5   | 1.333 |
| P26927 | Hepatocyte growth factor-like protein            | 8.72  | 6  | 6  | 7   | 1.095 |
| O42043 | HERV-K_1q23.3 provirus ancestral Env polyprotein | 1.61  | 1  | 1  | 1   | 0.463 |
| P04196 | Histidine-rich glycoprotein                      | 25.52 | 15 | 15 | 37  | 0.694 |
| P04196 | Histidine-rich glycoprotein                      | 22.48 | 14 | 14 | 41  | 0.672 |
| P0C0S5 | Histone H2A.Z                                    | 5.47  | 1  | 1  | 1   | 2.062 |
| P0C0S5 | Histone H2A.Z                                    | 5.47  | 1  | 1  | 1   | 2.064 |
| P62805 | Histone H4                                       | 9.71  | 1  | 1  | 1   | 0.936 |
| Q92839 | Hyaluronan synthase 1                            | 1.38  | 1  | 1  | 1   | 0.614 |
| Q14520 | Hyaluronan-binding protein 2                     | 9.11  | 6  | 6  | 7   | 0.711 |
| Q14520 | Hyaluronan-binding protein 2                     | 9.11  | 6  | 6  | 7   | 0.843 |
| Q9Y4L1 | Hypoxia up-regulated protein 1                   | 0.80  | 1  | 1  | 1   | 1.253 |

|        |                                                                        |       |    |    |     |       |
|--------|------------------------------------------------------------------------|-------|----|----|-----|-------|
| P01859 | Ig gamma-2 chain C region                                              | 3.07  | 1  | 1  | 1   | 0.593 |
| P01861 | Ig gamma-4 chain C region                                              | 7.95  | 2  | 2  | 2   | 0.530 |
| P01834 | Ig kappa chain C region                                                | 15.09 | 1  | 1  | 1   | 0.390 |
| P01834 | Ig kappa chain C region                                                | 15.09 | 1  | 1  | 1   | 0.323 |
| P01603 | Ig kappa chain V-I region Ka                                           | 14.81 | 1  | 1  | 2   | 0.324 |
| P0CG05 | Ig lambda-2 chain C regions                                            | 9.43  | 1  | 1  | 1   | 0.444 |
| P0CG05 | Ig lambda-2 chain C regions                                            | 9.43  | 1  | 1  | 1   | 0.486 |
| Q9Y6R7 | IgGFc-binding protein                                                  | 1.22  | 3  | 3  | 3   | 0.683 |
| Q9Y6R7 | IgGFc-binding protein                                                  | 1.46  | 4  | 4  | 5   | 0.632 |
| P01344 | Insulin-like growth factor II                                          | 8.89  | 1  | 1  | 1   | 0.795 |
| P18065 | Insulin-like growth factor-binding protein 2                           | 2.77  | 1  | 1  | 1   | 1.285 |
| P17936 | Insulin-like growth factor-binding protein 3                           | 19.93 | 5  | 5  | 7   | 1.630 |
| P17936 | Insulin-like growth factor-binding protein 3                           | 18.90 | 5  | 5  | 8   | 1.355 |
| P24592 | Insulin-like growth factor-binding protein 6                           | 2.50  | 1  | 1  | 1   |       |
| P35858 | Insulin-like growth factor-binding protein complex acid labile subunit | 37.85 | 19 | 19 | 49  | 1.070 |
| P35858 | Insulin-like growth factor-binding protein complex acid labile subunit | 44.46 | 22 | 22 | 53  | 1.190 |
| P19827 | Inter-alpha-trypsin inhibitor heavy chain H1                           | 23.16 | 17 | 17 | 70  | 1.061 |
| P19827 | Inter-alpha-trypsin inhibitor heavy chain H1                           | 24.48 | 18 | 18 | 84  | 0.990 |
| P19823 | Inter-alpha-trypsin inhibitor heavy chain H2                           | 27.06 | 27 | 27 | 127 | 1.152 |
| P19823 | Inter-alpha-trypsin inhibitor heavy chain H2                           | 29.70 | 28 | 28 | 122 | 1.228 |
| Q06033 | Inter-alpha-trypsin inhibitor heavy chain H3                           | 10.34 | 8  | 8  | 16  | 0.911 |
| Q06033 | Inter-alpha-trypsin inhibitor heavy chain H3                           | 11.57 | 9  | 9  | 18  | 1.179 |
| Q14624 | Inter-alpha-trypsin inhibitor heavy chain H4                           | 39.03 | 30 | 30 | 98  | 1.205 |
| Q14624 | Inter-alpha-trypsin inhibitor heavy chain H4                           | 43.98 | 31 | 31 | 91  | 1.193 |
| P05362 | Intercellular adhesion molecule 1                                      | 4.51  | 2  | 2  | 2   | 0.852 |
| P13598 | Intercellular adhesion molecule 2                                      | 2.55  | 1  | 1  | 1   | 1.570 |
| P13598 | Intercellular adhesion molecule 2                                      | 2.55  | 1  | 1  | 1   | 1.637 |
| P32942 | Intercellular adhesion molecule 3                                      | 1.65  | 1  | 1  | 1   | 1.173 |
| P32942 | Intercellular adhesion molecule 3                                      | 1.65  | 1  | 1  | 1   | 1.363 |
| Q9NPH3 | Interleukin-1 receptor accessory protein                               | 6.32  | 4  | 4  | 6   | 0.745 |
| Q9NPH3 | Interleukin-1 receptor accessory protein                               | 8.07  | 5  | 5  | 5   | 0.698 |
| P40189 | Interleukin-6 receptor subunit beta                                    | 0.87  | 1  | 1  | 1   | 0.848 |
| O75874 | Isocitrate dehydrogenase [NADP] cytoplasmic                            | 2.17  | 1  | 1  | 1   | 1.991 |
| O75874 | Isocitrate dehydrogenase [NADP] cytoplasmic                            | 2.17  | 1  | 1  | 1   | 2.335 |
| P29622 | Kallistatin                                                            | 32.79 | 12 | 12 | 20  | 1.030 |
| P29622 | Kallistatin                                                            | 39.58 | 15 | 15 | 26  | 1.079 |
| P13645 | Keratin, type I cytoskeletal 10                                        | 5.82  | 2  | 2  | 2   | 0.437 |
| P04264 | Keratin, type II cytoskeletal 1                                        | 1.40  | 1  | 1  | 1   | 0.588 |
| P04264 | Keratin, type II cytoskeletal 1                                        | 2.33  | 1  | 1  | 1   | 0.398 |
| P01042 | Kininogen-1                                                            | 28.42 | 20 | 20 | 76  | 1.028 |
| P01042 | Kininogen-1                                                            | 31.06 | 20 | 20 | 77  | 1.059 |
| P02788 | Lactotransferrin                                                       | 3.24  | 2  | 2  | 4   | 1.737 |
| P02788 | Lactotransferrin                                                       | 9.30  | 6  | 6  | 7   | 1.746 |
| P02750 | Leucine-rich alpha-2-glycoprotein                                      | 44.09 | 11 | 11 | 28  | 1.237 |
| P02750 | Leucine-rich alpha-2-glycoprotein                                      | 48.13 | 13 | 13 | 37  | 1.254 |
| P30740 | Leukocyte elastase inhibitor                                           | 3.17  | 1  | 1  | 1   | 1.046 |
| P30740 | Leukocyte elastase inhibitor                                           | 3.17  | 1  | 1  | 1   | 0.674 |
| P18428 | Lipopolysaccharide-binding protein                                     | 17.26 | 5  | 5  | 9   | 2.229 |
| P18428 | Lipopolysaccharide-binding protein                                     | 10.19 | 4  | 4  | 8   | 2.212 |
| P00338 | L-lactate dehydrogenase A chain                                        | 10.24 | 3  | 3  | 3   | 3.602 |
| P00338 | L-lactate dehydrogenase A chain                                        | 7.23  | 2  | 2  | 2   | 4.610 |
| P12318 | Low affinity immunoglobulin gamma Fc region                            | 6.94  | 1  | 1  | 1   | 0.412 |

|        |                                                            |       |   |   |    |       |
|--------|------------------------------------------------------------|-------|---|---|----|-------|
|        | receptor II-a                                              |       |   |   |    |       |
| P08637 | Low affinity immunoglobulin gamma Fc region receptor III-A | 4.33  | 1 | 1 | 1  | 0.778 |
| P08637 | Low affinity immunoglobulin gamma Fc region receptor III-A | 4.33  | 1 | 1 | 1  | 0.787 |
| P14151 | L-selectin                                                 | 6.72  | 2 | 2 | 2  | 0.747 |
| P14151 | L-selectin                                                 | 2.15  | 1 | 1 | 1  | 1.021 |
| P51884 | Lumican                                                    | 25.44 | 8 | 8 | 21 | 1.346 |
| P51884 | Lumican                                                    | 25.44 | 8 | 8 | 26 | 1.183 |
| Q9Y5Y7 | Lymphatic vessel endothelial hyaluronic acid receptor 1    | 2.80  | 1 | 1 | 2  | 0.995 |
| Q9Y5Y7 | Lymphatic vessel endothelial hyaluronic acid receptor 1    | 5.59  | 2 | 2 | 4  | 0.878 |
| P11279 | Lysosome-associated membrane glycoprotein 1                | 2.16  | 1 | 1 | 1  | 0.771 |
| P11279 | Lysosome-associated membrane glycoprotein 1                | 2.16  | 1 | 1 | 1  | 0.860 |
| P13473 | Lysosome-associated membrane glycoprotein 2                | 4.63  | 2 | 2 | 2  | 1.437 |
| P13473 | Lysosome-associated membrane glycoprotein 2                | 2.93  | 1 | 1 | 1  | 1.753 |
| P61626 | Lysozyme C                                                 | 11.49 | 2 | 2 | 3  | 1.281 |
| P61626 | Lysozyme C                                                 | 11.49 | 2 | 2 | 3  | 1.284 |
| Q8N5G2 | Macoilin                                                   | 1.05  | 1 | 1 | 1  | 1.004 |
| P07333 | Macrophage colony-stimulating factor 1 receptor            | 0.93  | 1 | 1 | 1  | 0.828 |
| P07333 | Macrophage colony-stimulating factor 1 receptor            | 1.75  | 1 | 1 | 2  | 0.841 |
| P22897 | Macrophage mannose receptor 1                              | 0.62  | 1 | 1 | 1  | 0.918 |
| P14174 | Macrophage migration inhibitory factor                     | 7.83  | 1 | 1 | 1  | 1.904 |
| Q9UEW3 | Macrophage receptor MARC                                   | 1.73  | 1 | 1 | 1  | 0.483 |
| P48740 | Mannan-binding lectin serine protease 1                    | 6.29  | 3 | 4 | 6  | 1.486 |
| P48740 | Mannan-binding lectin serine protease 1                    | 5.29  | 2 | 3 | 4  | 0.711 |
| O00187 | Mannan-binding lectin serine protease 2                    | 5.54  | 3 | 3 | 4  | 0.969 |
| O00187 | Mannan-binding lectin serine protease 2                    | 7.73  | 4 | 4 | 4  | 0.784 |
| P11226 | Mannose-binding protein C                                  | 19.76 | 4 | 4 | 10 | 0.685 |
| P11226 | Mannose-binding protein C                                  | 19.76 | 4 | 4 | 7  | 0.675 |
| P33908 | Mannosyl-oligosaccharide 1,2-alpha-mannosidase IA          | 3.98  | 2 | 2 | 2  | 0.567 |
| P14780 | Matrix metalloproteinase-9                                 | 1.70  | 1 | 1 | 1  | 1.058 |
| Q96HR3 | Mediator of RNA polymerase II transcription subunit 30     | 5.06  | 1 | 1 | 1  | 0.619 |
| Q16853 | Membrane primary amine oxidase                             | 1.57  | 1 | 1 | 1  | 1.076 |
| Q16853 | Membrane primary amine oxidase                             | 2.88  | 2 | 2 | 4  | 1.134 |
| P01033 | Metalloproteinase inhibitor 1                              | 5.80  | 1 | 1 | 1  | 0.642 |
| P01033 | Metalloproteinase inhibitor 1                              | 5.80  | 1 | 1 | 1  | 0.746 |
| P16035 | Metalloproteinase inhibitor 2                              | 4.09  | 1 | 1 | 1  | 1.080 |
| P26038 | Moesin                                                     | 4.68  | 3 | 3 | 3  | 1.148 |
| P26038 | Moesin                                                     | 4.51  | 3 | 3 | 3  | 2.046 |
| P08571 | Monocyte differentiation antigen CD14                      | 18.67 | 6 | 6 | 11 | 1.209 |
| P08571 | Monocyte differentiation antigen CD14                      | 23.47 | 8 | 8 | 14 | 1.164 |
| Q13201 | Multimerin-1                                               | 0.57  | 1 | 1 | 1  | 1.144 |
| Q9H8L6 | Multimerin-2                                               | 0.95  | 1 | 1 | 1  | 0.540 |
| Q7Z7M0 | Multiple epidermal growth factor-like domains protein 8    | 0.46  | 1 | 1 | 1  | 0.704 |

|        |                                                              |       |    |    |    |       |
|--------|--------------------------------------------------------------|-------|----|----|----|-------|
| Q9UNW1 | Multiple inositol polyphosphate phosphatase 1                | 1.85  | 1  | 1  | 2  | 0.848 |
| Q9UNW1 | Multiple inositol polyphosphate phosphatase 1                | 1.85  | 1  | 1  | 2  | 0.932 |
| Q9H7P6 | Multivesicular body subunit 12B                              | 3.45  | 1  | 1  | 1  | 1.040 |
| Q9H7P6 | Multivesicular body subunit 12B                              | 3.45  | 1  | 1  | 1  | 1.230 |
| P05164 | Myeloperoxidase                                              | 6.31  | 4  | 4  | 4  | 2.936 |
| P05164 | Myeloperoxidase                                              | 4.97  | 4  | 4  | 5  | 2.449 |
| P35579 | Myosin-9                                                     | 0.51  | 1  | 1  | 1  | 1.809 |
| P35579 | Myosin-9                                                     | 0.87  | 2  | 2  | 2  | 1.275 |
| Q09013 | Myotonin-protein kinase                                      | 1.27  | 1  | 1  | 2  |       |
| Q09013 | Myotonin-protein kinase                                      | 1.27  | 1  | 1  | 1  |       |
| P15586 | N-acetylglucosamine-6-sulfatase                              | 1.63  | 1  | 1  | 1  | 0.288 |
| P15586 | N-acetylglucosamine-6-sulfatase                              | 1.63  | 1  | 1  | 1  | 0.326 |
| Q96PD5 | N-acetylmuramoyl-L-alanine amidase                           | 33.33 | 11 | 11 | 22 | 0.991 |
| Q96PD5 | N-acetylmuramoyl-L-alanine amidase                           | 25.69 | 11 | 11 | 26 | 1.022 |
| Q9NPH5 | NADPH oxidase 4                                              | 1.38  | 1  | 1  | 1  | 1.455 |
| Q9NPH5 | NADPH oxidase 4                                              | 1.38  | 1  | 1  | 1  | 1.497 |
| Q92859 | Neogenin                                                     | 0.55  | 1  | 1  | 1  | 0.999 |
| Q92859 | Neogenin                                                     | 0.55  | 1  | 1  | 1  | 0.781 |
| Q8IZJ1 | Netrin receptor UNC5B                                        | 0.85  | 1  | 1  | 1  | 0.513 |
| P13591 | Neural cell adhesion molecule 1                              | 3.15  | 3  | 3  | 4  | 0.558 |
| P13591 | Neural cell adhesion molecule 1                              | 2.91  | 3  | 3  | 4  | 0.602 |
| O00533 | Neural cell adhesion molecule L1-like protein                | 1.82  | 2  | 2  | 3  | 0.811 |
| O00533 | Neural cell adhesion molecule L1-like protein                | 1.82  | 2  | 2  | 3  | 0.812 |
| Q92823 | Neuronal cell adhesion molecule                              | 1.00  | 1  | 1  | 1  | 0.586 |
| O14786 | Neuropilin-1                                                 | 2.71  | 2  | 2  | 2  | 0.340 |
| O14786 | Neuropilin-1                                                 | 2.17  | 2  | 2  | 2  | 0.579 |
| P59665 | Neutrophil defensin 1                                        | 9.57  | 1  | 1  | 1  | 6.129 |
| P08246 | Neutrophil elastase                                          | 2.62  | 1  | 1  | 1  | 0.652 |
| P14543 | Nidogen-1                                                    | 0.88  | 1  | 1  | 1  | 0.665 |
| P14543 | Nidogen-1                                                    | 0.88  | 1  | 1  | 1  | 0.974 |
| Q99784 | Noelin                                                       | 3.09  | 2  | 2  | 3  | 0.610 |
| O95897 | Noelin-2                                                     | 2.42  | 1  | 1  | 1  | 0.643 |
| P19838 | Nuclear factor NF-kappa-B p105 subunit                       | 1.03  | 1  | 1  | 4  | 0.440 |
| P19838 | Nuclear factor NF-kappa-B p105 subunit                       | 1.03  | 1  | 1  | 6  | 0.510 |
| Q9UKX7 | Nuclear pore complex protein Nup50                           | 1.71  | 1  | 1  | 2  | 1.080 |
| Q86UD1 |                                                              | 3.30  | 1  | 1  | 1  | 0.742 |
| Q86UD1 |                                                              | 9.52  | 2  | 2  | 2  | 1.085 |
| P04746 | Pancreatic alpha-amylase                                     | 2.15  | 1  | 1  | 1  | 0.799 |
| Q86YC2 | Partner and localizer of BRCA2                               | 0.59  | 1  | 1  | 1  | 0.344 |
| Q8WV60 | Pentatricopeptide repeat-containing protein 2, mitochondrial | 1.55  | 1  | 1  | 1  | 0.412 |
| Q6UXB8 | Peptidase inhibitor 16                                       | 2.16  | 1  | 1  | 1  | 1.007 |
| P19021 | Peptidyl-glycine alpha-amidating monooxygenase               | 0.82  | 1  | 1  | 1  | 1.097 |
| P19021 | Peptidyl-glycine alpha-amidating monooxygenase               | 0.82  | 1  | 1  | 1  | 1.228 |
| P62937 | Peptidyl-prolyl cis-trans isomerase A                        | 27.88 | 4  | 4  | 6  | 1.745 |
| P62937 | Peptidyl-prolyl cis-trans isomerase A                        | 25.45 | 3  | 4  | 6  | 1.548 |
| P23284 | Peptidyl-prolyl cis-trans isomerase B                        | 8.80  | 1  | 2  | 2  | 1.028 |
| Q13610 | Periodic tryptophan protein 1 homolog                        | 1.20  | 1  | 1  | 1  | 0.475 |
| Q15063 | Periostin                                                    | 3.35  | 2  | 2  | 2  | 1.833 |
| Q15063 | Periostin                                                    | 1.67  | 1  | 1  | 1  | 1.151 |
| P32119 | Peroxiredoxin-2                                              | 26.26 | 5  | 5  | 5  | 1.166 |
| P32119 | Peroxiredoxin-2                                              | 17.68 | 3  | 3  | 3  | 1.268 |

|        |                                                      |       |    |    |    |       |
|--------|------------------------------------------------------|-------|----|----|----|-------|
| Q9NR77 | Peroxisomal membrane protein 2                       | 5.64  | 1  | 1  | 1  | 0.296 |
| P04180 | Phosphatidylcholine-sterol acyltransferase           | 3.18  | 1  | 1  | 1  | 0.888 |
| P04180 | Phosphatidylcholine-sterol acyltransferase           | 3.18  | 1  | 1  | 1  | 0.813 |
| P80108 | Phosphatidylinositol-glycan-specific phospholipase D | 6.67  | 5  | 5  | 6  | 1.235 |
| P80108 | Phosphatidylinositol-glycan-specific phospholipase D | 6.43  | 5  | 5  | 5  | 1.154 |
| P00558 | Phosphoglycerate kinase 1                            | 4.08  | 1  | 1  | 1  | 4.469 |
| P00558 | Phosphoglycerate kinase 1                            | 4.08  | 1  | 1  | 1  | 3.526 |
| P15259 | Phosphoglycerate mutase 2                            | 4.35  | 1  | 1  | 1  | 1.821 |
| P55058 | Phospholipid transfer protein                        | 6.69  | 3  | 3  | 3  | 0.772 |
| P55058 | Phospholipid transfer protein                        | 10.75 | 4  | 4  | 4  | 0.855 |
| P36955 | Pigment epithelium-derived factor                    | 38.28 | 15 | 15 | 34 | 1.131 |
| P36955 | Pigment epithelium-derived factor                    | 33.97 | 13 | 13 | 38 | 1.036 |
| P03952 | Plasma kallikrein                                    | 18.34 | 11 | 11 | 13 | 0.926 |
| P03952 | Plasma kallikrein                                    | 19.91 | 13 | 13 | 17 | 0.999 |
| P05155 | Plasma protease C1 inhibitor                         | 15.80 | 7  | 7  | 30 | 0.619 |
| P05155 | Plasma protease C1 inhibitor                         | 17.60 | 8  | 8  | 24 | 0.725 |
| P05154 | Plasma serine protease inhibitor                     | 11.33 | 4  | 4  | 5  | 0.208 |
| P05154 | Plasma serine protease inhibitor                     | 16.01 | 6  | 6  | 10 | 0.236 |
| P00747 | Plasminogen                                          | 41.73 | 31 | 32 | 70 | 1.284 |
| P00747 | Plasminogen                                          | 40.74 | 30 | 31 | 70 | 1.314 |
| P13796 | Plastin-2                                            | 12.92 | 6  | 6  | 7  | 1.181 |
| P13796 | Plastin-2                                            | 17.38 | 10 | 10 | 12 | 1.271 |
| P02775 | Platelet basic protein                               | 44.53 | 6  | 6  | 17 | 1.025 |
| P02775 | Platelet basic protein                               | 36.72 | 5  | 5  | 13 | 1.053 |
| P02776 | Platelet factor 4                                    | 23.76 | 2  | 2  | 4  | 3.407 |
| P02776 | Platelet factor 4                                    | 34.65 | 3  | 3  | 7  | 2.198 |
| P07359 | Platelet glycoprotein Ib alpha chain                 | 4.95  | 3  | 3  | 3  | 1.473 |
| P07359 | Platelet glycoprotein Ib alpha chain                 | 6.87  | 4  | 4  | 5  | 0.886 |
| P40197 | Platelet glycoprotein V                              | 2.86  | 2  | 2  | 3  | 1.346 |
| P40197 | Platelet glycoprotein V                              | 3.75  | 2  | 2  | 2  | 0.931 |
| P15151 | Poliovirus receptor                                  | 1.92  | 1  | 1  | 1  | 1.607 |
| P15151 | Poliovirus receptor                                  | 3.60  | 2  | 2  | 3  | 1.380 |
| P0CG48 | Polyubiquitin-C                                      | 32.85 | 2  | 2  | 2  | 1.129 |
| P0CG48 | Polyubiquitin-C                                      | 44.67 | 3  | 3  | 5  | 1.569 |
| P20742 | Pregnancy zone protein                               | 4.79  | 3  | 7  | 13 | 0.682 |
| P20742 | Pregnancy zone protein                               | 3.85  | 2  | 6  | 12 | 0.532 |
| Q9UHG3 | Prenylcysteine oxidase 1                             | 5.15  | 2  | 2  | 3  | 0.750 |
| Q9UHG3 | Prenylcysteine oxidase 1                             | 2.97  | 1  | 1  | 2  | 0.393 |
| Q8TBY0 | Probable RNA-binding protein 46                      | 2.25  | 1  | 1  | 1  | 0.970 |
| Q9NQH7 | Probable Xaa-Pro aminopeptidase 3                    | 1.38  | 1  | 1  | 1  | 1.616 |
| Q15113 | Procollagen C-endopeptidase enhancer 1               | 3.56  | 1  | 1  | 2  | 0.560 |
| P07737 | Profilin-1                                           | 27.14 | 3  | 3  | 3  | 3.169 |
| P07737 | Profilin-1                                           | 27.14 | 3  | 3  | 5  | 4.432 |
| P27918 | Properdin                                            | 6.40  | 3  | 3  | 4  | 1.644 |
| P27918 | Properdin                                            | 3.62  | 2  | 2  | 3  | 1.582 |
| Q8NBP7 | Proprotein convertase subtilisin/kexin type 9        | 1.88  | 1  | 1  | 1  | 0.877 |
| P02760 | Protein AMBP                                         | 25.85 | 7  | 7  | 32 | 1.403 |
| P02760 | Protein AMBP                                         | 37.50 | 10 | 10 | 36 | 1.175 |
| O60888 | Protein CutA                                         | 7.82  | 1  | 1  | 1  | 1.109 |
| O60888 | Protein CutA                                         | 7.82  | 1  | 1  | 1  | 1.676 |
| Q15084 | Protein disulfide-isomerase A6                       | 3.18  | 1  | 1  | 1  | 1.112 |
| Q8WYP5 | Protein ELYS                                         | 0.44  | 1  | 1  | 1  | 1.346 |

|        |                                                      |       |    |    |    |              |
|--------|------------------------------------------------------|-------|----|----|----|--------------|
| O95866 | Protein G6b                                          | 3.73  | 1  | 1  | 1  | 0.960        |
| Q9ULI3 | Protein HEG homolog 1                                | 1.30  | 1  | 1  | 1  | 0.377        |
| Q9ULI3 | Protein HEG homolog 1                                | 1.81  | 2  | 2  | 2  | 0.587        |
| P06703 | Protein S100-A6                                      | 8.89  | 1  | 1  | 1  | 2.170        |
| P06703 | Protein S100-A6                                      | 8.89  | 1  | 1  | 2  | 1.929        |
| P05109 | Protein S100-A8                                      | 39.78 | 4  | 4  | 4  | 2.006        |
| P05109 | Protein S100-A8                                      | 32.26 | 3  | 3  | 3  | 1.828        |
| P06702 | Protein S100-A9                                      | 18.42 | 2  | 2  | 2  | 2.254        |
| P06702 | Protein S100-A9                                      | 17.54 | 2  | 2  | 2  | 3.214        |
| Q9Y4B5 | Protein S                                            | 0.47  | 1  | 1  | 2  | 0.802        |
| Q9Y4B5 | Protein S                                            | 0.47  | 1  | 1  | 1  | 1.321        |
| Q9UK55 | Protein Z-dependent protease inhibitor               | 10.14 | 4  | 4  | 4  | 1.413        |
| Q9UK55 | Protein Z-dependent protease inhibitor               | 10.14 | 4  | 4  | 4  | 1.757        |
| Q92954 | Proteoglycan 4                                       | 3.21  | 5  | 5  | 8  | 1.076        |
| Q92954 | Proteoglycan 4                                       | 5.56  | 8  | 8  | 17 | 1.066        |
| P00734 | Prothrombin                                          | 39.71 | 22 | 22 | 70 | <b>2.003</b> |
| P00734 | Prothrombin                                          | 42.77 | 23 | 23 | 56 | <b>2.128</b> |
| Q9Y5H8 | Protocadherin alpha-3                                | 1.47  | 1  | 1  | 2  | 0.829        |
| P48741 | Putative heat shock 70 kDa protein 7                 | 3.54  | 1  | 1  | 1  | 1.757        |
| A6NL28 | Putative tropomyosin alpha-3 chain-like protein      | 9.87  | 1  | 2  | 4  | 1.506        |
| P14618 | Pyruvate kinase PKM                                  | 4.52  | 2  | 2  | 2  | 2.318        |
| P14618 | Pyruvate kinase PKM                                  | 4.52  | 2  | 2  | 2  | 2.362        |
| Q9Y2Q5 | Ragulator complex protein LAMT                       | 12.00 | 1  | 1  | 1  | 0.353        |
| Q15404 | Ras suppressor protein 1                             | 2.53  | 1  | 1  | 1  | 2.000        |
| O95294 | RasGAP-activating-like protein 1                     | 0.75  | 1  | 1  | 1  | 0.551        |
| O00194 | Ras-related protein Rab-27B                          | 3.67  | 1  | 1  | 1  | 0.678        |
| O00194 | Ras-related protein Rab-27B                          | 3.67  | 1  | 1  | 1  | 0.713        |
| Q12913 | Receptor-type tyrosine-protein phosphatase eta       | 1.94  | 2  | 2  | 2  | 0.876        |
| Q12913 | Receptor-type tyrosine-protein phosphatase eta       | 1.94  | 2  | 2  | 2  | 0.935        |
| P10586 | Receptor-type tyrosine-protein phosphatase F         | 0.52  | 1  | 1  | 1  | 1.340        |
| P23470 | Receptor-type tyrosine-protein phosphatase gamma     | 2.63  | 3  | 3  | 3  | 0.835        |
| P23470 | Receptor-type tyrosine-protein phosphatase gamma     | 2.49  | 3  | 3  | 3  | 0.827        |
| Q86UN3 | Reticulon-4 receptor-like 2                          | 1.90  | 1  | 1  | 1  | 0.408        |
| P00352 | Retinal dehydrogenase 1                              | 2.00  | 1  | 1  | 1  | 1.361        |
| P00352 | Retinal dehydrogenase 1                              | 5.99  | 3  | 3  | 3  | 1.981        |
| P02753 | Retinol-binding protein 4                            | 29.85 | 6  | 6  | 15 | 0.958        |
| P02753 | Retinol-binding protein 4                            | 29.85 | 6  | 6  | 21 | 1.164        |
| P52566 | Rho GDP-dissociation inhibitor 2                     | 3.48  | 1  | 1  | 1  | 1.145        |
| Q8WZ75 | Roundabout homolog 4                                 | 0.70  | 1  | 1  | 1  | 0.140        |
| Q8WZ75 | Roundabout homolog 4                                 | 2.28  | 2  | 2  | 2  | 0.358        |
| Q59EK9 | RUN domain-containing protein 3A                     | 1.57  | 1  | 1  | 1  | 0.534        |
| Q86VB7 | Scavenger receptor cysteine-rich type 1 protein M130 | 2.16  | 2  | 2  | 2  | 1.119        |
| Q86VB7 | Scavenger receptor cysteine-rich type 1 protein M130 | 2.16  | 2  | 2  | 2  | 1.034        |
| Q13103 | Secreted phosphoprotein 24                           | 5.69  | 1  | 1  | 1  | 1.178        |
| P49908 | Selenoprotein P                                      | 8.40  | 4  | 4  | 5  | 1.054        |
| P49908 | Selenoprotein P                                      | 4.20  | 2  | 2  | 4  | 1.508        |
| Q96GX5 | Serine/threonine-protein kinase greatwall            | 1.14  | 1  | 1  | 1  | 2.184        |

|        |                                                                          |       |    |    |    |              |
|--------|--------------------------------------------------------------------------|-------|----|----|----|--------------|
| Q9P1W9 | Serine/threonine-protein kinase pim-2                                    | 2.25  | 1  | 1  | 2  | 1.138        |
| Q9P1W9 | Serine/threonine-protein kinase pim-2                                    | 2.25  | 1  | 1  | 2  | 1.213        |
| P02787 | Serotransferrin                                                          | 33.24 | 20 | 21 | 38 | <b>0.354</b> |
| P02787 | Serotransferrin                                                          | 34.96 | 22 | 22 | 44 | <b>0.308</b> |
| Q86U17 | Serpin A11                                                               | 4.03  | 1  | 1  | 1  | 0.595        |
| P02768 | Serum albumin                                                            | 14.45 | 10 | 10 | 13 | 0.765        |
| P02768 | Serum albumin                                                            | 11.99 | 8  | 8  | 14 | 0.787        |
| PODJI8 | Serum amyloid A-1 protein                                                | 35.25 | 3  | 3  | 3  | 0.329        |
| PODJI8 | Serum amyloid A-1 protein                                                | 35.25 | 3  | 3  | 6  | 0.308        |
| P35542 | Serum amyloid A-4 protein                                                | 17.69 | 2  | 2  | 2  | 0.719        |
| P35542 | Serum amyloid A-4 protein                                                | 11.54 | 1  | 1  | 1  | 1.358        |
| P02743 | Serum amyloid P-component                                                | 32.74 | 8  | 8  | 26 | 0.514        |
| P02743 | Serum amyloid P-component                                                | 32.74 | 8  | 8  | 33 | 0.647        |
| P27169 | Serum paraoxonase/arylesterase 1                                         | 23.94 | 7  | 7  | 9  | 1.446        |
| P27169 | Serum paraoxonase/arylesterase 1                                         | 25.92 | 8  | 8  | 11 | 1.745        |
| P04278 | Sex hormone-binding globulin                                             | 26.12 | 8  | 8  | 15 | 1.373        |
| P04278 | Sex hormone-binding globulin                                             | 27.11 | 8  | 8  | 14 | 1.463        |
| Q9H299 | SH3 domain-binding glutamic acid-rich-like protein 3                     | 26.88 | 2  | 2  | 4  | 3.247        |
| Q9H299 | SH3 domain-binding glutamic acid-rich-like protein 3                     | 26.88 | 2  | 2  | 4  | 2.136        |
| Q9H7L9 | Sin3 histone deacetylase corepressor complex component SDS3              | 1.83  | 1  | 1  | 1  | 0.064        |
| Q9Y4D2 | Sn1-specific diacylglycerol lipase alpha                                 | 0.96  | 1  | 1  | 1  | 0.668        |
| Q9Y4D2 | Sn1-specific diacylglycerol lipase alpha                                 | 0.96  | 1  | 1  | 1  | 0.532        |
| A1L4H1 | Soluble scavenger receptor cysteine-rich domain-containing protein SSC5D | 0.95  | 1  | 1  | 2  | 0.495        |
| A1L4H1 | Soluble scavenger receptor cysteine-rich domain-containing protein SSC5D | 0.95  | 1  | 1  | 2  | 0.612        |
| P09486 | SPARC                                                                    | 7.59  | 2  | 2  | 3  | 0.646        |
| P09486 | SPARC                                                                    | 10.56 | 3  | 3  | 4  | 0.733        |
| Q14515 | SPARC-like protein 1                                                     | 1.51  | 1  | 1  | 1  |              |
| O00391 | Sulfhydryl oxidase 1                                                     | 7.23  | 4  | 4  | 5  | 0.778        |
| O00391 | Sulfhydryl oxidase 1                                                     | 9.50  | 6  | 6  | 9  | 0.861        |
| P00441 | Superoxide dismutase [Cu-Zn]                                             | 6.49  | 1  | 1  | 1  | 1.294        |
| P00441 | Superoxide dismutase [Cu-Zn]                                             | 6.49  | 1  | 1  | 1  | 1.375        |
| P04179 | Superoxide dismutase [Mn], mitochondrial                                 | 6.31  | 1  | 1  | 1  | 0.895        |
| Q9Y490 | Talin-1                                                                  | 1.18  | 2  | 2  | 3  | 4.817        |
| Q9Y490 | Talin-1                                                                  | 2.44  | 5  | 5  | 5  | 1.762        |
| P24821 | Tenascin                                                                 | 0.91  | 2  | 2  | 2  | 0.974        |
| P22105 | Tenascin-X                                                               | 1.96  | 6  | 6  | 7  | 0.997        |
| P22105 | Tenascin-X                                                               | 2.31  | 8  | 8  | 10 | 0.889        |
| P05452 | Tetranectin                                                              | 39.60 | 7  | 7  | 10 | 1.000        |
| P05452 | Tetranectin                                                              | 27.23 | 5  | 5  | 9  | 1.175        |
| P10599 | Thioredoxin                                                              | 12.38 | 1  | 1  | 1  | 1.254        |
| P07996 | Thrombospondin-1                                                         | 15.90 | 17 | 17 | 26 | 0.945        |
| P07996 | Thrombospondin-1                                                         | 17.86 | 17 | 17 | 21 | 0.842        |
| P62328 | Thymosin beta-4                                                          | 15.91 | 1  | 1  | 1  | 4.825        |
| P62328 | Thymosin beta-4                                                          | 15.91 | 1  | 1  | 1  | 3.476        |
| P05543 | Thyroxine-binding globulin                                               | 21.93 | 10 | 10 | 16 | 1.260        |
| P05543 | Thyroxine-binding globulin                                               | 35.42 | 15 | 15 | 27 | 1.127        |
| P04066 | Tissue alpha-L-fucosidase                                                | 2.36  | 1  | 1  | 1  | 0.683        |
| Q8WZ42 | Titin                                                                    | 0.03  | 1  | 1  | 1  | 0.945        |
| Q8WZ42 | Titin                                                                    | 0.03  | 1  | 1  | 1  | 0.900        |

|        |                                                           |       |    |    |    |       |
|--------|-----------------------------------------------------------|-------|----|----|----|-------|
| Q9H4I3 | TraB domain-containing protein                            | 4.26  | 1  | 1  | 3  | 0.667 |
| Q9H4I3 | TraB domain-containing protein                            | 4.26  | 1  | 1  | 1  | 1.242 |
| Q86S22 | Trafficking protein particle complex subunit 6B           | 5.70  | 1  | 1  | 1  | 0.527 |
| Q86S22 | Trafficking protein particle complex subunit 6B           | 5.70  | 1  | 1  | 1  | 0.339 |
| P37837 | Transaldolase                                             | 3.26  | 1  | 1  | 1  | 3.463 |
| P02786 | Transferrin receptor protein 1                            | 1.84  | 1  | 1  | 1  | 0.520 |
| P02786 | Transferrin receptor protein 1                            | 1.84  | 1  | 1  | 1  | 0.619 |
| Q15582 | Transforming growth factor-beta-induced protein ig-h3     | 5.12  | 3  | 3  | 3  | 1.002 |
| Q15582 | Transforming growth factor-beta-induced protein ig-h3     | 9.66  | 5  | 5  | 5  | 1.019 |
| P37802 | Transgelin-2                                              | 23.12 | 3  | 3  | 4  | 1.346 |
| P37802 | Transgelin-2                                              | 24.62 | 4  | 4  | 5  | 1.689 |
| P55072 | Transitional endoplasmic reticulum ATPase                 | 2.11  | 1  | 1  | 1  | 1.742 |
| P29401 | Transketolase                                             | 1.93  | 1  | 1  | 1  | 1.176 |
| P02766 | Transthyretin                                             | 23.81 | 2  | 2  | 2  | 0.547 |
| P02766 | Transthyretin                                             | 32.65 | 3  | 3  | 3  | 0.623 |
| Q86YW5 | Trem-like transcript 1 protein                            | 5.14  | 1  | 1  | 1  | 1.722 |
| P06753 | Tropomyosin alpha-3 chain                                 | 13.33 | 1  | 4  | 7  | 0.826 |
| P06753 | Tropomyosin alpha-3 chain                                 | 9.82  | 1  | 3  | 3  | 1.843 |
| P67936 | Tropomyosin alpha-4 chain                                 | 16.94 | 2  | 5  | 7  | 1.744 |
| P67936 | Tropomyosin alpha-4 chain                                 | 13.71 | 2  | 4  | 4  | 1.822 |
| Q9UIG0 | Tyrosine-protein kinase BAZ1B                             | 0.61  | 1  | 1  | 1  | 0.706 |
| P41240 | Tyrosine-protein kinase CSK                               | 2.44  | 1  | 1  | 1  | 0.228 |
| P30530 | Tyrosine-protein kinase receptor UF                       | 1.34  | 1  | 1  | 1  | 0.923 |
| P30530 | Tyrosine-protein kinase receptor UF                       | 1.34  | 1  | 1  | 1  | 1.046 |
| P07911 | Uromodulin                                                | 1.41  | 1  | 1  | 1  | 1.398 |
| P06132 | Uroporphyrinogen decarboxylase                            | 2.45  | 1  | 1  | 2  | 0.363 |
| P19320 | Vascular cell adhesion protein 1                          | 4.60  | 3  | 3  | 3  | 0.688 |
| P19320 | Vascular cell adhesion protein 1                          | 5.14  | 4  | 4  | 4  | 0.631 |
| P35916 | Vascular endothelial growth factor receptor 3             | 1.54  | 1  | 1  | 1  | 0.379 |
| P35916 | Vascular endothelial growth factor receptor 3             | 0.73  | 1  | 1  | 1  | 0.611 |
| Q6EMK4 | Vasorin                                                   | 5.35  | 3  | 3  | 4  | 0.827 |
| Q6EMK4 | Vasorin                                                   | 6.39  | 4  | 4  | 5  | 0.733 |
| P18206 | Vinculin                                                  | 4.50  | 5  | 5  | 5  | 2.809 |
| P18206 | Vinculin                                                  | 4.06  | 5  | 5  | 5  | 3.624 |
| P02774 | Vitamin D-binding protein                                 | 45.99 | 21 | 21 | 91 | 1.231 |
| P02774 | Vitamin D-binding protein                                 | 52.53 | 24 | 24 | 94 | 1.283 |
| P04070 | Vitamin K-dependent protein C                             | 7.38  | 3  | 3  | 4  | 0.980 |
| P04070 | Vitamin K-dependent protein C                             | 8.03  | 4  | 4  | 6  | 0.775 |
| P07225 | Vitamin K-dependent protein S                             | 12.43 | 9  | 9  | 15 | 0.802 |
| P07225 | Vitamin K-dependent protein S                             | 13.02 | 9  | 9  | 14 | 0.706 |
| P22891 | Vitamin K-dependent protein Z                             | 4.50  | 2  | 2  | 4  | 1.430 |
| P22891 | Vitamin K-dependent protein Z                             | 6.00  | 3  | 3  | 3  | 1.077 |
| P04004 | Vitronectin                                               | 23.01 | 10 | 10 | 41 | 0.974 |
| P04004 | Vitronectin                                               | 21.97 | 10 | 10 | 37 | 0.995 |
| P54289 | Voltage-dependent calcium channel subunit alpha-2/delta-1 | 0.73  | 1  | 1  | 1  | 0.870 |
| P04275 | von Willebrand factor                                     | 2.31  | 6  | 6  | 7  | 0.823 |
| P04275 | von Willebrand factor                                     | 3.63  | 8  | 8  | 10 | 0.909 |
| P12955 | Xaa-Pro dipeptidase                                       | 1.42  | 1  | 1  | 1  | 0.833 |
| Q9NQZ6 | Zinc finger C4H2 domain-containing protein                | 3.13  | 1  | 1  | 2  | 0.226 |
| Q9NQZ6 | Zinc finger C4H2 domain-containing protein                | 3.13  | 1  | 1  | 3  | 0.323 |
| Q8IWR0 | Zinc finger CCCH domain-containing protein 7A             | 1.75  | 1  | 1  | 1  | 1.490 |



|        |                           |       |    |    |    |       |
|--------|---------------------------|-------|----|----|----|-------|
| Q76KX8 | Zinc finger protein 534   | 1.19  | 1  | 1  | 1  | 1.053 |
| Q76KX8 | Zinc finger protein 534   | 1.19  | 1  | 1  | 1  | 0.945 |
| P25311 | Zinc-alpha-2-glycoprotein | 40.60 | 11 | 11 | 37 | 0.979 |
| P25311 | Zinc-alpha-2-glycoprotein | 52.01 | 15 | 15 | 44 | 0.933 |

**Table S3.** A list of identified proteins (283 proteins) in two technical replicates from PQ poisoning patients and healthy controls

| Accession | Description                                                       | Score   | Coverage | Peptides | PSMs | Replicate 1 | Replicate 2 |
|-----------|-------------------------------------------------------------------|---------|----------|----------|------|-------------|-------------|
| P61981    | 14-3-3 protein gamma                                              | 38.5    | 10.93    | 2        | 3    | 1.06        | 0.96        |
| P63104    | 14-3-3 protein zeta/delta                                         | 114.68  | 21.63    | 4        | 6    | 2.45        | 2.33        |
| P11021    | 78 kDa glucose-regulated protein                                  | 38.02   | 7.03     | 3        | 3    | 0.71        | 0.76        |
| Q76LX8    | A disintegrin and metalloproteinase with thrombospondin motifs 13 | 83.44   | 2.31     | 3        | 4    | 0.89        | 1.22        |
| Q13085    | Acetyl-CoA carboxylase 1                                          | 0       | 0.3      | 1        | 1    | 2.05        | 1.84        |
| P60709    | Actin, cytoplasmic 1                                              | 274.99  | 26.67    | 9        | 20   | 2.14        | 2.06        |
| Q01518    | Adenylyl cyclase-associated protein 1                             | 21.38   | 2.74     | 1        | 1    | 0.94        | 1.04        |
| Q9HDC9    | Adipocyte plasma membrane-associated protein                      | 21.25   | 1.68     | 1        | 1    | 0.53        | 0.55        |
| Q15848    | Adiponectin                                                       | 37.75   | 6.15     | 1        | 1    | 0.84        | 0.86        |
| P61204    | ADP-ribosylation factor 3                                         | 0       | 3.87     | 1        | 1    | 2.18        | 1.87        |
| P43652    | Afamin                                                            | 512.51  | 34.06    | 24       | 60   | 1.11        | 0.96        |
| P02763    | Alpha-1-acid glycoprotein 1                                       | 50.94   | 15.92    | 6        | 10   | 0.3         | 0.54        |
| P19652    | Alpha-1-acid glycoprotein 2                                       | 89.17   | 16.42    | 6        | 10   | 0.33        | 0.31        |
| P01011    | Alpha-1-antichymotrypsin                                          | 1047.36 | 34.28    | 15       | 87   | 1.13        | 1.04        |
| P01009    | Alpha-1-antitrypsin                                               | 1204.08 | 53.83    | 22       | 102  | 0.3         | 0.31        |
| P04217    | Alpha-1B-glycoprotein                                             | 965.91  | 33.94    | 14       | 101  | 1.08        | 1.07        |
| P08697    | Alpha-2-antiplasmin                                               | 315.31  | 24.64    | 10       | 27   | 1.61        | 1.61        |
| P02765    | Alpha-2-HS-glycoprotein                                           | 1085.28 | 45.5     | 13       | 81   | 1.41        | 1.41        |
| P01023    | Alpha-2-macroglobulin                                             | 731.26  | 25.31    | 29       | 47   | 0.38        | 0.34        |
| P12814    | Alpha-actinin-1                                                   | 23.68   | 2.58     | 3        | 3    | 2.89        | 1.42        |
| P06733    | Alpha-enolase                                                     | 0       | 1.84     | 1        | 1    | 1.58        | 1.12        |
| P02771    | Alpha-fetoprotein                                                 | 32.2    | 1.15     | 1        | 1    | 0.28        | 0.34        |
| Q16706    | Alpha-mannosidase 2                                               | 0       | 0.61     | 1        | 1    | 1.53        | 1.3         |
| P15144    | Aminopeptidase N                                                  | 53.52   | 3.31     | 3        | 3    | 0.74        | 0.79        |
| P03950    | Angiogenin                                                        | 46.78   | 13.61    | 1        | 1    | 0.56        | 0.6         |
| P01019    | Angiotensinogen                                                   | 628.81  | 19.79    | 9        | 33   | 1.25        | 1.2         |
| P01008    | Antithrombin-III                                                  | 1526.73 | 44.83    | 23       | 82   | 1.39        | 1.35        |
| P02647    | Apolipoprotein A-I                                                | 1318.38 | 66.29    | 17       | 110  | 0.31        | 0.3         |
| P02652    | Apolipoprotein A-II                                               | 164.93  | 62       | 5        | 19   | 0.35        | 0.39        |
| P06727    | Apolipoprotein A-IV                                               | 816.69  | 52.53    | 21       | 63   | 1.1         | 1.2         |
| P04114    | Apolipoprotein B-100                                              | 5448.5  | 41.62    | 173      | 498  | 0.9         | 0.94        |

|        |                                                                      |        |       |    |    |      |      |
|--------|----------------------------------------------------------------------|--------|-------|----|----|------|------|
| P02654 | Apolipoprotein C-I                                                   | 71.01  | 30.12 | 3  | 4  | 0.57 | 0.5  |
| P02655 | Apolipoprotein C-II                                                  | 72.51  | 49.5  | 4  | 6  | 0.57 | 0.58 |
| P02656 | Apolipoprotein C-III                                                 | 321.22 | 27.27 | 2  | 10 | 0.59 | 0.63 |
| P55056 | Apolipoprotein C-IV                                                  | 24.32  | 12.6  | 2  | 2  | 0.61 | 0.54 |
| P05090 | Apolipoprotein D                                                     | 74.93  | 12.7  | 2  | 2  | 0.32 | 0.37 |
| P02649 | Apolipoprotein E                                                     | 488.97 | 58.99 | 19 | 39 | 0.93 | 0.92 |
| Q13790 | Apolipoprotein F                                                     | 126.84 | 8.28  | 2  | 3  | 0.52 | 0.62 |
| O14791 | Apolipoprotein L1                                                    | 140.56 | 22.11 | 6  | 7  | 0.6  | 0.69 |
| O95445 | Apolipoprotein M                                                     | 141.91 | 15.96 | 3  | 5  | 0.87 | 0.91 |
| P08519 | Apolipoprotein(a)                                                    | 113.22 | 7.5   | 3  | 6  | 2.63 | 1.73 |
| P17174 | Aspartate aminotransferase, cytoplasmic                              | 23.21  | 2.18  | 1  | 1  | 0.39 | 0.47 |
| O75882 | Attractin                                                            | 177.89 | 8.33  | 9  | 12 | 0.58 | 0.6  |
| P98160 | Basement membrane-specific heparan sulfate proteoglycan core protein | 12.32  | 0.48  | 2  | 2  | 0.9  | 0.44 |
| P02749 | Beta-2-glycoprotein 1                                                | 267.97 | 45.8  | 12 | 27 | 1.51 | 1.41 |
| P61769 | Beta-2-microglobulin                                                 | 42.74  | 16.81 | 2  | 2  | 0.64 | 0.7  |
| Q96KN2 | Beta-Ala-His dipeptidase                                             | 38.19  | 10.26 | 5  | 6  | 0.84 | 1.01 |
| P43251 | Biotinidase                                                          | 205.41 | 13.26 | 6  | 11 | 1.04 | 1.29 |
| P13727 | Bone marrow proteoglycan                                             | 72.5   | 8.11  | 1  | 1  | 1.32 | 0.58 |
| P04003 | C4b-binding protein alpha chain                                      | 166.61 | 11.89 | 7  | 13 | 0.32 | 0.34 |
| P20851 | C4b-binding protein beta chain                                       | 61.04  | 3.57  | 1  | 2  | 0.37 | 0.36 |
| P12830 | Cadherin-1                                                           | 63.46  | 1.59  | 1  | 1  | 0.66 | 0.68 |
| P55290 | Cadherin-13                                                          | 91.41  | 3.65  | 4  | 5  | 0.66 | 0.89 |
| P33151 | Cadherin-5                                                           | 35.48  | 1.66  | 1  | 1  | 1.27 | 1.13 |
| P00915 | Carbonic anhydrase 1                                                 | 109.97 | 9.96  | 3  | 6  | 1.19 | 1.41 |
| Q96IY4 | Carboxypeptidase B2                                                  | 180.7  | 19.15 | 9  | 17 | 1.14 | 1.06 |
| P15169 | Carboxypeptidase N catalytic chain                                   | 120.98 | 18.56 | 8  | 11 | 0.93 | 1.21 |
| P22792 | Carboxypeptidase N subunit 2                                         | 147.3  | 23.49 | 11 | 17 | 1.5  | 1.37 |
| Q9Y646 | Carboxypeptidase Q                                                   | 21.23  | 1.91  | 1  | 1  | 0.72 | 0.68 |
| Q9NQ79 | Cartilage acidic protein 1                                           | 66.1   | 5.14  | 2  | 2  | 0.62 | 0.63 |
| P49747 | Cartilage oligomeric matrix protein                                  | 40.34  | 6.08  | 4  | 4  | 0.82 | 0.69 |
| P04040 | Catalase                                                             | 94.41  | 10.06 | 4  | 4  | 1.09 | 1.06 |
| P08311 | Cathepsin G                                                          | 0      | 3.53  | 1  | 1  | 1.63 | 1.2  |
| Q6YHK3 | CD109 antigen                                                        | 0      | 0.69  | 2  | 2  | 1.16 | 1.15 |
| P16070 | CD44 antigen                                                         | 120.34 | 2.83  | 2  | 4  | 1.42 | 1.5  |

|        |                                          |         |       |    |     |      |      |
|--------|------------------------------------------|---------|-------|----|-----|------|------|
| O43866 | CD5 antigen-like                         | 33.68   | 2.02  | 1  | 2   | 1.05 | 1.37 |
| P43121 | Cell surface glycoprotein MUC18          | 39.22   | 5.88  | 3  | 3   | 0.64 | 0.67 |
| P00450 | Ceruloplasmin                            | 1469    | 38.12 | 35 | 122 | 1.36 | 1.2  |
| P06276 | Cholinesterase                           | 183.29  | 15.61 | 8  | 11  | 1.29 | 1.04 |
| Q99895 | Chymotrypsin-C                           | 23.1    | 2.61  | 1  | 1   | 0.93 | 0.99 |
| P10909 | Clusterin                                | 343.62  | 23.83 | 9  | 23  | 1.44 | 1.24 |
| P00740 | Coagulation factor IX                    | 32.26   | 6.94  | 4  | 5   | 1.73 | 2.05 |
| P12259 | Coagulation factor V                     | 88.18   | 4.99  | 13 | 14  | 0.96 | 0.93 |
| P08709 | Coagulation factor VII                   | 28.75   | 4.94  | 1  | 1   | 0.52 | 0.78 |
| P00742 | Coagulation factor X                     | 158.28  | 16.19 | 6  | 8   | 1.01 | 1.22 |
| P03951 | Coagulation factor XI                    | 91.59   | 15.04 | 11 | 15  | 1.4  | 1.31 |
| P00748 | Coagulation factor XII                   | 155.94  | 19.67 | 13 | 18  | 1.2  | 0.96 |
| P00488 | Coagulation factor XIII A chain          | 40.66   | 10.38 | 6  | 6   | 1.31 | 1.74 |
| P05160 | Coagulation factor XIII B chain          | 172.33  | 16.34 | 9  | 13  | 1.07 | 0.92 |
| P39060 | Collagen alpha-1(XVIII) chain            | 47.71   | 0.97  | 1  | 1   | 0.87 | 0.91 |
| P12111 | Collagen alpha-3(VI) chain               | 52.24   | 1.57  | 4  | 4   | 0.76 | 0.77 |
| Q9BWP8 | Collectin-11                             | 16.14   | 4.06  | 1  | 1   | 1.34 | 1.07 |
| P02745 | Complement C1q subcomponent subunit A    | 51.36   | 13.47 | 2  | 3   | 0.99 | 1.04 |
| P02746 | Complement C1q subcomponent subunit B    | 79.47   | 8.7   | 2  | 5   | 0.53 | 0.5  |
| P02747 | Complement C1q subcomponent subunit C    | 113.52  | 25.31 | 5  | 10  | 0.89 | 0.77 |
| P00736 | Complement C1r subcomponent              | 270.89  | 28.94 | 17 | 28  | 1.31 | 1.42 |
| Q9NZP8 | Complement C1r subcomponent-like protein | 43.35   | 10.68 | 6  | 8   | 1.3  | 0.8  |
| P09871 | Complement C1s subcomponent              | 332.94  | 22.53 | 12 | 20  | 0.83 | 0.91 |
| P06681 | Complement C2                            | 569.97  | 23.4  | 19 | 37  | 1.01 | 0.84 |
| P01024 | Complement C3                            | 339.67  | 19.18 | 28 | 47  | 1.39 | 1.41 |
| POC0L4 | Complement C4-A                          | 2741.83 | 44.15 | 72 | 276 | 1.37 | 1.37 |
| POC0L5 | Complement C4-B                          | 2758.12 | 43.92 | 73 | 278 | 0.77 | 0.79 |
| P01031 | Complement C5                            | 839.2   | 24.11 | 44 | 85  | 0.91 | 0.96 |
| P13671 | Complement component C6                  | 666.93  | 21.73 | 19 | 41  | 1.43 | 1.2  |
| P10643 | Complement component C7                  | 420.71  | 22.89 | 18 | 38  | 0.99 | 0.97 |
| P07357 | Complement component C8 alpha chain      | 198.74  | 19.52 | 9  | 14  | 1.72 | 1.5  |
| P07358 | Complement component C8 beta chain       | 254.26  | 25.38 | 15 | 27  | 1.05 | 1.09 |
| P07360 | Complement component C8 gamma chain      | 260.9   | 58.42 | 8  | 14  | 1.28 | 1.28 |
| P02748 | Complement component C9                  | 406.33  | 28.98 | 18 | 43  | 1.36 | 1.38 |

|        |                                                                  |         |       |    |     |      |      |
|--------|------------------------------------------------------------------|---------|-------|----|-----|------|------|
| P00751 | Complement factor B                                              | 1071.04 | 41.88 | 33 | 95  | 1.3  | 1.24 |
| P00746 | Complement factor D                                              | 84.48   | 15.42 | 3  | 4   | 0.79 | 0.89 |
| P08603 | Complement factor H                                              | 1248.59 | 41.75 | 42 | 102 | 1.13 | 1.16 |
| Q03591 | Complement factor H-related protein 1                            | 198.33  | 21.82 | 7  | 14  | 1.58 | 1.46 |
| P36980 | Complement factor H-related protein 2                            | 152.88  | 23.33 | 6  | 10  | 1.8  | 1.26 |
| P05156 | Complement factor I                                              | 202.39  | 20.24 | 9  | 17  | 1.22 | 1.29 |
| P08185 | Corticosteroid-binding globulin                                  | 199.85  | 22.22 | 7  | 18  | 0.72 | 0.84 |
| P24387 | Corticotropin-releasing factor-binding protein                   | 21.01   | 3.11  | 1  | 1   | 0.62 | 0.55 |
| P02741 | C-reactive protein                                               | 151.78  | 20.98 | 5  | 13  | 2.17 | 2.25 |
| P01034 | Cystatin-C                                                       | 16.12   | 7.53  | 1  | 1   | 0.39 | 0.59 |
| P54108 | Cysteine-rich secretory protein 3                                | 47.01   | 6.53  | 2  | 3   | 1.36 | 1.09 |
| P81605 | Dermcidin                                                        | 32.69   | 10    | 1  | 1   | 0.84 | 0.74 |
| Q14126 | Desmoglein-2                                                     | 0       | 0.89  | 1  | 1   | 1.11 | 1.08 |
| Q01459 | Di-N-acetylchitobiase                                            | 25.32   | 5.97  | 2  | 2   | 0.84 | 0.7  |
| Q9H4A9 | Dipeptidase 2                                                    | 29.92   | 2.06  | 1  | 1   | 1    | 0.73 |
| P27487 | Dipeptidyl peptidase 4                                           | 35.36   | 6.79  | 4  | 4   | 1.17 | 1.46 |
| P09172 | Dopamine beta-hydroxylase                                        | 45.23   | 5.35  | 3  | 7   | 0.61 | 0.63 |
| Q13822 | Ectonucleotide pyrophosphatase/phosphodiesterase family member 2 | 25.35   | 2.67  | 1  | 1   | 0.39 | 0.56 |
| Q9NZ08 | Endoplasmic reticulum aminopeptidase 1                           | 0       | 1.38  | 1  | 1   | 1.21 | 0.65 |
| Q9UNN8 | Endothelial protein C receptor                                   | 21.36   | 3.78  | 1  | 1   | 0.63 | 0.71 |
| Q9UBQ6 | Exostosin-like 2                                                 | 20.54   | 2.12  | 1  | 1   | 0.94 | 1.02 |
| Q16610 | Extracellular matrix protein 1                                   | 109.72  | 17.78 | 7  | 9   | 1.55 | 1.13 |
| P08294 | Extracellular superoxide dismutase [Cu-Zn]                       | 22.32   | 8.75  | 1  | 1   | 2.49 | 1    |
| Q86UX7 | Fermitin family homolog 3                                        | 82.99   | 6     | 3  | 4   | 3.1  | 2.19 |
| Q9UGM5 | Fetuin-B                                                         | 88.23   | 18.32 | 6  | 9   | 1.22 | 1.13 |
| P02671 | Fibrinogen alpha chain                                           | 289.94  | 12.47 | 9  | 23  | 0.88 | 1.15 |
| P02675 | Fibrinogen beta chain                                            | 36.45   | 6.92  | 6  | 7   | 1.17 | 0.88 |
| P02679 | Fibrinogen gamma chain                                           | 14.13   | 1.99  | 1  | 1   | 0.8  | 0.95 |
| P02751 | Fibronectin                                                      | 288.05  | 8.21  | 15 | 21  | 1.04 | 1.32 |
| P23142 | Fibulin-1                                                        | 45.2    | 6.97  | 4  | 6   | 1.23 | 1.17 |
| Q15485 | Ficolin-2                                                        | 21.23   | 5.11  | 1  | 2   | 0.6  | 0.64 |
| O75636 | Ficolin-3                                                        | 293.58  | 34.11 | 10 | 24  | 0.92 | 0.92 |
| P30043 | Flavin reductase (NADPH)                                         | 60.24   | 7.28  | 1  | 2   | 1.85 | 0.82 |
| P04075 | Fructose-bisphosphate aldolase A                                 | 17.56   | 2.2   | 3  | 3   | 1.81 | 1.97 |

|        |                                                                        |         |       |    |     |      |      |
|--------|------------------------------------------------------------------------|---------|-------|----|-----|------|------|
| P05062 | Fructose-bisphosphate aldolase B                                       | 70.31   | 7.14  | 2  | 2   | 1.3  | 1.31 |
| P16930 | Fumarylacetoacetase                                                    | 39.32   | 3.1   | 4  | 4   | 0.66 | 1.61 |
| Q08380 | Galectin-3-binding protein                                             | 57.21   | 10.26 | 5  | 7   | 0.87 | 1.07 |
| Q92820 | Gamma-glutamyl hydrolase                                               | 88.42   | 9.12  | 2  | 3   | 1.21 | 0.78 |
| P06396 | Gelsolin                                                               | 560.72  | 32.86 | 23 | 43  | 1.02 | 1.01 |
| P22352 | Glutathione peroxidase 3                                               | 79.27   | 15.93 | 3  | 6   | 0.84 | 0.76 |
| P68871 | Hemoglobin subunit beta                                                | 54.6    | 27.89 | 4  | 7   | 0.63 | 0.64 |
| P02790 | Hemopexin                                                              | 1695.47 | 52.81 | 23 | 134 | 0.93 | 0.86 |
| P05546 | Heparin cofactor 2                                                     | 305.65  | 18.24 | 15 | 42  | 1.18 | 1.14 |
| Q04756 | Hepatocyte growth factor activator                                     | 154.4   | 9.01  | 5  | 7   | 1.35 | 1.44 |
| P26927 | Hepatocyte growth factor-like protein                                  | 99.88   | 5.63  | 4  | 5   | 1.33 | 1.09 |
| P04196 | Histidine-rich glycoprotein                                            | 401.29  | 25.52 | 14 | 41  | 0.67 | 0.69 |
| POC055 | Histone H2A.Z                                                          | 0       | 5.47  | 1  | 1   | 2.06 | 2.06 |
| Q14520 | Hyaluronan-binding protein 2                                           | 65.4    | 9.11  | 6  | 7   | 0.71 | 0.84 |
| P01834 | Ig kappa chain C region                                                | 47.57   | 15.09 | 1  | 1   | 0.32 | 0.39 |
| POCG05 | Ig lambda-2 chain C regions                                            | 22.94   | 9.43  | 1  | 1   | 0.49 | 0.44 |
| Q9Y6R7 | IgGFc-binding protein                                                  | 26.69   | 1.22  | 3  | 3   | 0.68 | 0.63 |
| P17936 | Insulin-like growth factor-binding protein 3                           | 87.33   | 19.93 | 5  | 7   | 1.63 | 1.36 |
| P35858 | Insulin-like growth factor-binding protein complex acid labile subunit | 986.75  | 37.85 | 19 | 49  | 1.07 | 1.19 |
| P19827 | Inter-alpha-trypsin inhibitor heavy chain H1                           | 986.72  | 23.16 | 18 | 84  | 0.99 | 1.06 |
| P19823 | Inter-alpha-trypsin inhibitor heavy chain H2                           | 1608.54 | 27.06 | 27 | 127 | 1.15 | 1.23 |
| Q06033 | Inter-alpha-trypsin inhibitor heavy chain H3                           | 276.42  | 10.34 | 8  | 16  | 0.91 | 1.18 |
| Q14624 | Inter-alpha-trypsin inhibitor heavy chain H4                           | 1348.2  | 39.03 | 30 | 98  | 1.21 | 1.19 |
| P13598 | Intercellular adhesion molecule 2                                      | 0       | 2.55  | 1  | 1   | 1.57 | 1.64 |
| P32942 | Intercellular adhesion molecule 3                                      | 0       | 1.65  | 1  | 1   | 1.36 | 1.17 |
| Q9NPH3 | Interleukin-1 receptor accessory protein                               | 30.23   | 6.32  | 4  | 6   | 0.75 | 0.7  |
| O75874 | Isocitrate dehydrogenase [NADP] cytoplasmic                            | 25.13   | 2.17  | 1  | 1   | 1.99 | 2.33 |
| P29622 | Kallistatin                                                            | 266.44  | 32.79 | 15 | 26  | 1.08 | 1.03 |
| P04264 | Keratin, type II cytoskeletal 1                                        | 32.12   | 1.4   | 1  | 1   | 0.4  | 0.59 |
| P01042 | Kininogen-1                                                            | 718.96  | 28.42 | 20 | 77  | 1.06 | 1.03 |
| P02788 | Lactotransferrin                                                       | 33.69   | 3.24  | 6  | 7   | 1.75 | 1.74 |
| P02750 | Leucine-rich alpha-2-glycoprotein                                      | 346.19  | 44.09 | 13 | 37  | 1.25 | 1.24 |
| P30740 | Leukocyte elastase inhibitor                                           | 38.88   | 3.17  | 1  | 1   | 1.05 | 0.67 |
| P18428 | Lipopolysaccharide-binding protein                                     | 182.66  | 17.26 | 5  | 9   | 2.23 | 2.21 |

|        |                                                            |        |       |    |    |      |      |
|--------|------------------------------------------------------------|--------|-------|----|----|------|------|
| P00338 | L-lactate dehydrogenase A chain                            | 28.16  | 10.24 | 3  | 3  | 3.6  | 4.61 |
| P08637 | Low affinity immunoglobulin gamma Fc region receptor III-A | 21.05  | 4.33  | 1  | 1  | 0.78 | 0.79 |
| P14151 | L-selectin                                                 | 23.54  | 6.72  | 2  | 2  | 0.75 | 1.02 |
| P51884 | Lumican                                                    | 350.68 | 25.44 | 8  | 26 | 1.18 | 1.35 |
| Q9Y5Y7 | Lymphatic vessel endothelial hyaluronic acid receptor 1    | 31.03  | 2.8   | 1  | 2  | 1    | 0.88 |
| P11279 | Lysosome-associated membrane glycoprotein 1                | 25.3   | 2.16  | 1  | 1  | 0.77 | 0.86 |
| P13473 | Lysosome-associated membrane glycoprotein 2                | 23.99  | 4.63  | 1  | 1  | 1.75 | 1.44 |
| P61626 | Lysozyme C                                                 | 32.88  | 11.49 | 2  | 3  | 1.28 | 1.28 |
| P07333 | Macrophage colony-stimulating factor 1 receptor            | 35.68  | 0.93  | 1  | 2  | 0.84 | 0.83 |
| P48740 | Mannan-binding lectin serine protease 1                    | 96.48  | 6.29  | 4  | 6  | 1.49 | 0.71 |
| O00187 | Mannan-binding lectin serine protease 2                    | 47.46  | 5.54  | 4  | 4  | 0.97 | 0.78 |
| P11226 | Mannose-binding protein C                                  | 187    | 19.76 | 4  | 10 | 0.68 | 0.68 |
| Q16853 | Membrane primary amine oxidase                             | 26.09  | 1.57  | 2  | 4  | 1.13 | 1.08 |
| P01033 | Metalloproteinase inhibitor 1                              | 44.59  | 5.8   | 1  | 1  | 0.64 | 0.75 |
| P26038 | Moesin                                                     | 31.43  | 4.68  | 3  | 3  | 2.05 | 1.15 |
| P08571 | Monocyte differentiation antigen CD14                      | 194.64 | 18.67 | 8  | 14 | 1.16 | 1.21 |
| Q9UNW1 | Multiple inositol polyphosphate phosphatase 1              | 41.61  | 1.85  | 1  | 2  | 0.85 | 0.93 |
| Q9H7P6 | Multivesicular body subunit 12B                            | 32.23  | 3.45  | 1  | 1  | 1.04 | 1.23 |
| P05164 | Myeloperoxidase                                            | 47.86  | 6.31  | 4  | 4  | 2.94 | 2.45 |
| P35579 | Myosin-9                                                   | 0      | 0.51  | 1  | 1  | 1.81 | 1.27 |
| P15586 | N-acetylglucosamine-6-sulfatase                            | 14.79  | 1.63  | 1  | 1  | 0.29 | 0.33 |
| Q96PD5 | N-acetylmuramoyl-L-alanine amidase OS                      | 339.87 | 33.33 | 11 | 22 | 0.99 | 1.02 |
| Q9NPH5 | NADPH oxidase 4                                            | 0      | 1.38  | 1  | 1  | 1.46 | 1.5  |
| Q92859 | Neogenin                                                   | 27.38  | 0.55  | 1  | 1  | 1    | 0.78 |
| P13591 | Neural cell adhesion molecule 1                            | 30.18  | 3.15  | 3  | 4  | 0.56 | 0.6  |
| O00533 | Neural cell adhesion molecule L1-like protein              | 26.22  | 1.82  | 2  | 3  | 0.81 | 0.81 |
| O14786 | Neuropilin-1                                               | 46.91  | 2.71  | 2  | 2  | 0.34 | 0.58 |
| P14543 | Nidogen-1                                                  | 20.39  | 0.88  | 1  | 1  | 0.97 | 0.67 |
| P19838 | Nuclear factor NF-kappa-B p105 subunit                     | 34.46  | 1.03  | 1  | 4  | 0.44 | 0.51 |
| Q86UD1 | Out at first protein homolog                               | 21.54  | 3.3   | 1  | 1  | 0.74 | 1.09 |
| P19021 | Peptidyl-glycine alpha-amidating monooxygenase             | 0      | 0.82  | 1  | 1  | 1.1  | 1.23 |
| P62937 | Peptidyl-prolyl cis-trans isomerase A                      | 67.32  | 27.88 | 4  | 6  | 1.74 | 1.55 |
| Q15063 | Periostin                                                  | 34.99  | 3.35  | 2  | 2  | 1.83 | 1.15 |
| P32119 | Peroxiredoxin-2                                            | 59.65  | 26.26 | 3  | 3  | 1.27 | 1.17 |

|        |                                                      |         |       |    |    |      |      |
|--------|------------------------------------------------------|---------|-------|----|----|------|------|
| P04180 | Phosphatidylcholine-sterol acyltransferase           | 32.48   | 3.18  | 1  | 1  | 0.81 | 0.89 |
| P80108 | Phosphatidylinositol-glycan-specific phospholipase D | 78.2    | 6.67  | 5  | 6  | 1.23 | 1.15 |
| P00558 | Phosphoglycerate kinase 1                            | 98.25   | 4.08  | 1  | 1  | 4.47 | 3.53 |
| P55058 | Phospholipid transfer protein                        | 44.14   | 6.69  | 4  | 4  | 0.85 | 0.77 |
| P36955 | Pigment epithelium-derived factor                    | 386.59  | 38.28 | 15 | 34 | 1.13 | 1.04 |
| P03952 | Plasma kallikrein                                    | 143.63  | 18.34 | 13 | 17 | 1    | 0.93 |
| P05155 | Plasma protease C1 inhibitor                         | 264.61  | 15.8  | 8  | 24 | 0.72 | 0.62 |
| P05154 | Plasma serine protease inhibitor                     | 98.05   | 11.33 | 6  | 10 | 0.24 | 0.21 |
| P00747 | Plasminogen                                          | 1058.05 | 41.73 | 32 | 70 | 1.28 | 1.31 |
| P13796 | Plastin-2                                            | 101.4   | 12.92 | 6  | 7  | 1.18 | 1.27 |
| P02775 | Platelet basic protein                               | 183.85  | 44.53 | 6  | 17 | 1.02 | 1.05 |
| P02776 | Platelet factor 4                                    | 58.45   | 23.76 | 3  | 7  | 2.2  | 3.41 |
| P07359 | Platelet glycoprotein Ib alpha chain                 | 46.94   | 4.95  | 3  | 3  | 1.47 | 0.89 |
| P40197 | Platelet glycoprotein V                              | 28.79   | 2.86  | 2  | 2  | 0.93 | 1.35 |
| P15151 | Poliiovirus receptor                                 | 41.51   | 1.92  | 1  | 1  | 1.61 | 1.38 |
| P0CG48 | Polyubiquitin-C                                      | 30.62   | 32.85 | 3  | 5  | 1.57 | 1.13 |
| P20742 | Pregnancy zone protein                               | 172.95  | 4.79  | 6  | 12 | 0.53 | 0.68 |
| Q9UHG3 | Prenylcysteine oxidase 1                             | 70.39   | 5.15  | 2  | 3  | 0.75 | 0.39 |
| P07737 | Profilin-1                                           | 38.39   | 27.14 | 3  | 5  | 4.43 | 3.17 |
| P27918 | Properdin                                            | 57.83   | 6.4   | 3  | 4  | 1.64 | 1.58 |
| P02760 | Protein AMBP                                         | 537.05  | 25.85 | 10 | 36 | 1.17 | 1.4  |
| O60888 | Protein CutA                                         | 41.26   | 7.82  | 1  | 1  | 1.11 | 1.68 |
| Q9ULI3 | Protein HEG homolog 1                                | 43.86   | 1.3   | 1  | 1  | 0.38 | 0.59 |
| P06703 | Protein S100-A6                                      | 0       | 8.89  | 1  | 1  | 2.17 | 1.93 |
| P05109 | Protein S100-A8                                      | 52.08   | 39.78 | 4  | 4  | 2.01 | 1.83 |
| P06702 | Protein S100-A9                                      | 29.69   | 18.42 | 2  | 2  | 3.21 | 2.25 |
| Q9Y4B5 | Protein SOGA2                                        | 15.23   | 0.47  | 1  | 2  | 0.8  | 1.32 |
| Q9UK55 | Protein Z-dependent protease inhibitor               | 101.25  | 10.14 | 4  | 4  | 1.41 | 1.76 |
| Q92954 | Proteoglycan 4                                       | 60.24   | 3.21  | 5  | 8  | 1.08 | 1.07 |
| P00734 | Prothrombin                                          | 1041.07 | 39.71 | 22 | 70 | 2    | 2.13 |
| P14618 | Pyruvate kinase PKM                                  | 24.97   | 4.52  | 2  | 2  | 2.36 | 2.32 |
| O00194 | Ras-related protein Rab-27B                          | 24.57   | 3.67  | 1  | 1  | 0.68 | 0.71 |
| Q12913 | Receptor-type tyrosine-protein phosphatase eta       | 45.6    | 1.94  | 2  | 2  | 0.88 | 0.94 |
| P23470 | Receptor-type tyrosine-protein phosphatase gamma     | 40.44   | 2.63  | 3  | 3  | 0.84 | 0.83 |



|        |                                                                          |        |       |    |    |      |      |
|--------|--------------------------------------------------------------------------|--------|-------|----|----|------|------|
| P00352 | Retinal dehydrogenase 1                                                  | 0      | 2     | 3  | 3  | 1.98 | 1.36 |
| P02753 | Retinol-binding protein 4                                                | 146.89 | 29.85 | 6  | 21 | 1.16 | 0.96 |
| Q8WZ75 | Roundabout homolog 4                                                     | 18.41  | 0.7   | 1  | 1  | 0.14 | 0.36 |
| Q86VB7 | Scavenger receptor cysteine-rich type 1 protein M130                     | 49.91  | 2.16  | 2  | 2  | 1.12 | 1.03 |
| P49908 | Selenoprotein P                                                          | 19.64  | 8.4   | 2  | 4  | 1.51 | 1.05 |
| Q9P1W9 | Serine/threonine-protein kinase pim-2                                    | 0      | 2.25  | 1  | 2  | 1.14 | 1.21 |
| P02787 | Serotransferrin                                                          | 481.09 | 33.24 | 22 | 44 | 0.31 | 0.35 |
| P02768 | Serum albumin                                                            | 169.97 | 14.45 | 10 | 13 | 0.26 | 0.29 |
| P0DJI8 | Serum amyloid A-1 protein                                                | 93.65  | 35.25 | 3  | 3  | 0.33 | 0.31 |
| P35542 | Serum amyloid A-4 protein                                                | 23.46  | 17.69 | 2  | 2  | 0.72 | 1.36 |
| P02743 | Serum amyloid P-component                                                | 265.56 | 32.74 | 10 | 13 | 0.51 | 0.65 |
| P27169 | Serum paraoxonase/arylesterase 1                                         | 104.36 | 23.94 | 7  | 9  | 1.45 | 1.75 |
| P04278 | Sex hormone-binding globulin                                             | 261.91 | 26.12 | 8  | 15 | 1.37 | 1.46 |
| Q9H299 | SH3 domain-binding glutamic acid-rich-like protein 3                     | 80.68  | 26.88 | 2  | 4  | 3.25 | 2.14 |
| Q9Y4D2 | Sn1-specific diacylglycerol lipase alpha                                 | 26.35  | 0.96  | 1  | 1  | 0.67 | 0.53 |
| A1L4H1 | Soluble scavenger receptor cysteine-rich domain-containing protein SSC5D | 83.06  | 0.95  | 1  | 2  | 0.5  | 0.61 |
| P09486 | SPARC                                                                    | 91.15  | 7.59  | 2  | 3  | 0.65 | 0.73 |
| O00391 | Sulfhydryl oxidase 1                                                     | 129.14 | 7.23  | 6  | 9  | 0.78 | 0.86 |
| P00441 | Superoxide dismutase [Cu-Zn]                                             | 48.3   | 6.49  | 1  | 1  | 1.29 | 1.38 |
| Q9Y490 | Talin-1                                                                  | 66.06  | 1.18  | 2  | 3  | 4.82 | 1.76 |
| P22105 | Tenascin-X                                                               | 97.65  | 1.96  | 6  | 7  | 1    | 0.89 |
| P05452 | Tetranectin                                                              | 198.14 | 39.6  | 5  | 9  | 1.17 | 1    |
| P07996 | Thrombospondin-1                                                         | 354.62 | 15.9  | 17 | 26 | 0.95 | 0.84 |
| P62328 | Thymosin beta-4                                                          | 29.05  | 15.91 | 1  | 1  | 4.82 | 3.48 |
| P05543 | Thyroxine-binding globulin                                               | 180.89 | 21.93 | 15 | 27 | 1.13 | 1.26 |
| Q8WZ42 | Titin                                                                    | 12.32  | 0.03  | 1  | 1  | 0.94 | 0.9  |
| Q9H4I3 | TraB domain-containing protein                                           | 24.35  | 4.26  | 1  | 3  | 0.67 | 1.24 |
| Q86S22 | Trafficking protein particle complex subunit 6B                          | 43.84  | 5.7   | 1  | 1  | 0.34 | 0.53 |
| P02786 | Transferrin receptor protein 1                                           | 30.47  | 1.84  | 1  | 1  | 0.62 | 0.52 |
| Q15582 | Transforming growth factor-beta-induced protein ig-h3                    | 58.68  | 5.12  | 5  | 5  | 1.02 | 1    |
| P37802 | Transgelin-2                                                             | 42.94  | 23.12 | 4  | 5  | 1.69 | 1.35 |
| P02766 | Transthyretin                                                            | 37.18  | 23.81 | 3  | 3  | 0.62 | 0.55 |
| P06753 | Tropomyosin alpha-3 chain                                                | 24.42  | 13.33 | 4  | 7  | 1.84 | 0.83 |
| P67936 | Tropomyosin alpha-4 chain                                                | 26.87  | 16.94 | 5  | 7  | 1.74 | 1.82 |

|        |                                               |        |       |    |    |      |      |
|--------|-----------------------------------------------|--------|-------|----|----|------|------|
| P30530 | Tyrosine-protein kinase receptor UFO          | 43.74  | 1.34  | 1  | 1  | 0.92 | 1.05 |
| P19320 | Vascular cell adhesion protein 1              | 63.88  | 4.6   | 3  | 3  | 0.69 | 0.63 |
| P35916 | Vascular endothelial growth factor receptor 3 | 53.23  | 1.54  | 1  | 1  | 0.38 | 0.61 |
| Q6EMK4 | Vasorin                                       | 56.66  | 5.35  | 4  | 5  | 0.73 | 0.83 |
| P18206 | Vinculin                                      | 35.97  | 4.5   | 5  | 5  | 3.62 | 2.81 |
| P02774 | Vitamin D-binding protein                     | 759.28 | 45.99 | 21 | 91 | 1.23 | 1.28 |
| P04070 | Vitamin K-dependent protein C                 | 86.15  | 7.38  | 4  | 6  | 0.77 | 0.98 |
| P07225 | Vitamin K-dependent protein S                 | 150.45 | 12.43 | 9  | 14 | 0.71 | 0.8  |
| P22891 | Vitamin K-dependent protein Z                 | 79.45  | 4.5   | 2  | 4  | 1.43 | 1.08 |
| P04004 | Vitronectin                                   | 577.13 | 23.01 | 10 | 37 | 0.99 | 0.97 |
| P04275 | von Willebrand factor                         | 51.1   | 2.31  | 8  | 10 | 0.91 | 0.82 |
| Q9NQZ6 | Zinc finger C4H2 domain-containing protein    | 31.26  | 3.13  | 1  | 2  | 0.23 | 0.32 |
| Q76KX8 | Zinc finger protein 534                       | 21.69  | 1.19  | 1  | 1  | 1.05 | 0.94 |
| P25311 | Zinc-alpha-2-glycoprotein                     | 551.69 | 40.6  | 11 | 37 | 0.98 | 0.93 |

**Table S4.** A list of differentially expressed proteins (81 proteins) in two technical replicates from PQ poisoning patients and healthy controls

| Accession | Description                                  | Score   | Coverage | Peptides | PSMs | Replication 1 | Replication 2 |
|-----------|----------------------------------------------|---------|----------|----------|------|---------------|---------------|
| P63104    | 14-3-3 protein zeta/delta                    | 114.68  | 21.63    | 4        | 6    | 2.45          | 2.33          |
| Q13085    | Acetyl-CoA carboxylase 1                     | 0.00    | 0.30     | 1        | 1    | 2.05          | 1.84          |
| P60709    | Actin, cytoplasmic 1                         | 274.99  | 26.67    | 9        | 20   | 2.14          | 2.06          |
| Q9HDC9    | Adipocyte plasma membrane-associated protein | 0.00    | 1.68     | 1        | 1    | 0.53          | 0.55          |
| P61204    | ADP-ribosylation factor 3                    | 0.00    | 3.87     | 1        | 1    | 2.18          | 1.87          |
| P02763    | Alpha-1-acid glycoprotein 1                  | 50.94   | 15.92    | 6        | 10   | 0.30          | 0.54          |
| P19652    | Alpha-1-acid glycoprotein 2                  | 89.17   | 16.42    | 6        | 10   | 0.33          | 0.31          |
| P01009    | Alpha-1-antitrypsin                          | 1204.08 | 53.83    | 22       | 102  | 0.30          | 0.31          |
| P08697    | Alpha-2-antiplasmin                          | 315.31  | 24.64    | 10       | 27   | 1.61          | 1.61          |
| P01023    | Alpha-2-macroglobulin                        | 731.26  | 25.31    | 29       | 47   | 0.38          | 0.34          |
| P02771    | Alpha-fetoprotein                            | 0.00    | 1.15     | 1        | 1    | 0.28          | 0.34          |
| P03950    | Angiogenin                                   | 46.78   | 13.61    | 1        | 1    | 0.56          | 0.60          |
| P02647    | Apolipoprotein A-I                           | 1318.38 | 66.29    | 17       | 110  | 0.31          | 0.30          |

|        |                                                                          |             |       |   |    |      |      |
|--------|--------------------------------------------------------------------------|-------------|-------|---|----|------|------|
| P02652 | Apolipoprotein A-II                                                      | 164.93      | 62.00 | 5 | 19 | 0.35 | 0.39 |
| P02654 | Apolipoprotein C-I                                                       | 71.01       | 30.12 | 3 | 4  | 0.57 | 0.50 |
| P02655 | Apolipoprotein C-II                                                      | 72.51       | 49.50 | 4 | 6  | 0.57 | 0.58 |
| P02656 | Apolipoprotein C-III                                                     | 321.22      | 27.27 | 2 | 10 | 0.59 | 0.63 |
| P55056 | Apolipoprotein C-IV                                                      | 0.00        | 12.60 | 2 | 2  | 0.61 | 0.54 |
| P05090 | Apolipoprotein D                                                         | 74.93       | 12.70 | 2 | 2  | 0.32 | 0.37 |
| Q13790 | Apolipoprotein F                                                         | 126.84      | 8.28  | 2 | 3  | 0.52 | 0.62 |
| O14791 | Apolipoprotein L1                                                        | 140.56      | 22.11 | 6 | 7  | 0.60 | 0.69 |
| P17174 | Aspartate aminotransferase, cytoplasmic                                  | 0.00        | 2.18  | 1 | 1  | 0.39 | 0.47 |
| O75882 | Attractin                                                                | 177.89      | 8.33  | 9 | 12 | 0.58 | 0.60 |
| P04003 | C4b-binding protein alpha chain                                          | 166.61      | 11.89 | 7 | 13 | 0.32 | 0.34 |
| P20851 | C4b-binding protein beta chain                                           | 61.04       | 3.57  | 1 | 2  | 0.37 | 0.36 |
| Q9NQ79 | Cartilage acidic protein 1                                               | 66.10       | 5.14  | 2 | 2  | 0.62 | 0.63 |
| P43121 | Cell surface glycoprotein MUC18                                          | 39.22       | 5.88  | 3 | 3  | 0.64 | 0.67 |
| P00740 | Coagulation factor IX                                                    | 32.26       | 6.94  | 4 | 5  | 1.73 | 2.05 |
| P02746 | Complement C1q subcomponent subunit B                                    | 79.47       | 8.70  | 2 | 5  | 0.53 | 0.50 |
| P07357 | Complement component C8 alpha chain                                      | 198.74      | 19.52 | 9 | 14 | 1.72 | 1.50 |
| Q03591 | Complement factor H-related protein 1                                    | 198.33      | 21.82 | 7 | 14 | 1.58 | 1.46 |
| P24387 | Corticotropin-releasing factor-binding protein                           | 0.00        | 3.11  | 1 | 1  | 0.62 | 0.55 |
| P02741 | C-reactive protein                                                       | 151.78      | 20.98 | 5 | 13 | 2.17 | 2.25 |
| P01034 | Cystatin-C                                                               | 16.12       | 7.53  | 1 | 1  | 0.39 | 0.59 |
| P09172 | Dopamine beta-hydroxylase                                                | 45.23       | 5.35  | 3 | 7  | 0.61 | 0.63 |
| Q13822 | Ectonucleotide pyrophosphatase/phosphodiesterase family member 2         | 0.00        | 2.67  | 1 | 1  | 0.39 | 0.56 |
| Q15485 | Ficolin-2                                                                | 0.00        | 5.11  | 1 | 2  | 0.60 | 0.64 |
| P04075 | Fructose-bisphosphate aldolase A                                         | 17.56       | 2.20  | 3 | 3  | 1.81 | 1.97 |
| P68871 | Hemoglobin subunit beta                                                  | 54.60       | 27.89 | 4 | 7  | 0.63 | 0.64 |
| POC0S5 | Histone H2A.Z                                                            | 0.00        | 5.47  | 1 | 1  | 2.06 | 2.06 |
| P01834 | Ig kappa chain C region                                                  | 47.57       | 15.09 | 1 | 1  | 0.32 | 0.39 |
| POCG05 | Ig lambda-2 chain C regions                                              | 22.94       | 9.43  | 1 | 1  | 0.49 | 0.44 |
| Q9Y6R7 | IgGFc-binding protein OS=Homo sapiens GN=FCGBP PE=1 SV=3 - [FCGBP_HUMAN] | 26.68810198 | 1.22  | 1 | 3  | 0.68 | 0.56 |
| P13598 | Intercellular adhesion molecule 2                                        | 0.00        | 2.55  | 1 | 1  | 1.57 | 1.64 |
| O75874 | Isocitrate dehydrogenase [NADP] cytoplasmic                              | 25.13       | 2.17  | 1 | 1  | 1.99 | 2.33 |
| P04264 | Keratin, type II cytoskeletal 1                                          | 0.00        | 1.40  | 1 | 1  | 0.40 | 0.59 |

|        |                                                                          |         |       |    |    |      |      |
|--------|--------------------------------------------------------------------------|---------|-------|----|----|------|------|
| P02788 | Lactotransferrin                                                         | 33.69   | 3.24  | 6  | 7  | 1.75 | 1.74 |
| P18428 | Lipopolysaccharide-binding protein                                       | 182.66  | 17.26 | 5  | 9  | 2.23 | 2.21 |
| P00338 | L-lactate dehydrogenase A chain                                          | 28.16   | 10.24 | 3  | 3  | 3.60 | 4.61 |
| P05164 | Myeloperoxidase                                                          | 47.86   | 6.31  | 4  | 4  | 2.94 | 2.45 |
| P15586 | N-acetylglucosamine-6-sulfatase                                          | 14.79   | 1.63  | 1  | 1  | 0.29 | 0.33 |
| P13591 | Neural cell adhesion molecule 1                                          | 30.18   | 3.15  | 3  | 4  | 0.56 | 0.60 |
| O14786 | Neuropilin-1                                                             | 46.91   | 2.71  | 2  | 2  | 0.34 | 0.58 |
| P19838 | Nuclear factor NF-kappa-B p105 subunit                                   | 34.46   | 1.03  | 1  | 4  | 0.44 | 0.51 |
| P62937 | Peptidyl-prolyl cis-trans isomerase A                                    | 67.32   | 27.88 | 4  | 6  | 1.74 | 1.55 |
| P00558 | Phosphoglycerate kinase 1                                                | 98.25   | 4.08  | 1  | 1  | 4.47 | 3.53 |
| P05154 | Plasma serine protease inhibitor                                         | 98.05   | 11.33 | 6  | 10 | 0.24 | 0.21 |
| P0CG48 | Polyubiquitin-C                                                          | 30.62   | 32.85 | 3  | 5  | 1.57 | 1.13 |
| P20742 | Pregnancy zone protein                                                   | 172.95  | 4.79  | 6  | 12 | 0.53 | 0.68 |
| P07737 | Profilin-1                                                               | 38.39   | 27.14 | 3  | 5  | 4.43 | 3.17 |
| P27918 | Properdin                                                                | 57.83   | 6.40  | 3  | 4  | 1.64 | 1.58 |
| Q9ULI3 | Protein HEG homolog 1                                                    | 43.86   | 1.30  | 1  | 1  | 0.38 | 0.59 |
| P06703 | Protein S100-A6                                                          | 0.00    | 8.89  | 1  | 1  | 2.17 | 1.93 |
| P05109 | Protein S100-A8                                                          | 52.08   | 39.78 | 4  | 4  | 2.01 | 1.83 |
| P06702 | Protein S100-A9                                                          | 29.69   | 18.42 | 2  | 2  | 3.21 | 2.25 |
| P00734 | Prothrombin                                                              | 1041.07 | 39.71 | 22 | 70 | 2.00 | 2.13 |
| P14618 | Pyruvate kinase PKM                                                      | 24.97   | 4.52  | 2  | 2  | 2.36 | 2.32 |
| Q8WZ75 | Roundabout homolog 4                                                     | 18.41   | 0.70  | 1  | 1  | 0.14 | 0.36 |
| P02787 | Serotransferrin                                                          | 481.09  | 33.24 | 22 | 44 | 0.31 | 0.35 |
| P02743 | Serum amyloid P-component                                                | 265.56  | 32.74 | 10 | 13 | 0.51 | 0.65 |
| P0DJI8 | Serum amyloid A-1 protein                                                | 93.65   | 35.25 | 3  | 3  | 0.33 | 0.31 |
| Q9Y4D2 | Sn1-specific diacylglycerol lipase alpha                                 | 28.43   | 0.96  | 1  | 1  | 0.53 | 0.66 |
| A1L4H1 | Soluble scavenger receptor cysteine-rich domain-containing protein SSC5D | 83.06   | 0.95  | 1  | 2  | 0.50 | 0.61 |
| P62328 | Thymosin beta-4                                                          | 29.05   | 15.91 | 1  | 1  | 4.82 | 3.48 |
| Q86S22 | Trafficking protein particle complex subunit 6B                          | 0.00    | 5.70  | 1  | 1  | 0.34 | 0.53 |
| P02786 | Transferrin receptor protein 1                                           | 30.47   | 1.84  | 1  | 1  | 0.62 | 0.52 |
| P02766 | Transthyretin                                                            | 37.18   | 23.81 | 3  | 3  | 0.62 | 0.55 |
| P67936 | Tropomyosin alpha-4 chain                                                | 26.87   | 16.94 | 5  | 7  | 1.74 | 1.82 |
| P35916 | Vascular endothelial growth factor receptor 3                            | 0.00    | 1.54  | 1  | 1  | 0.38 | 0.61 |

|        |                                            |       |      |   |   |      |      |
|--------|--------------------------------------------|-------|------|---|---|------|------|
| P18206 | Vinculin                                   | 35.97 | 4.50 | 5 | 5 | 3.62 | 2.81 |
| Q9NQZ6 | Zinc finger C4H2 domain-containing protein | 31.26 | 3.13 | 1 | 2 | 0.23 | 0.32 |

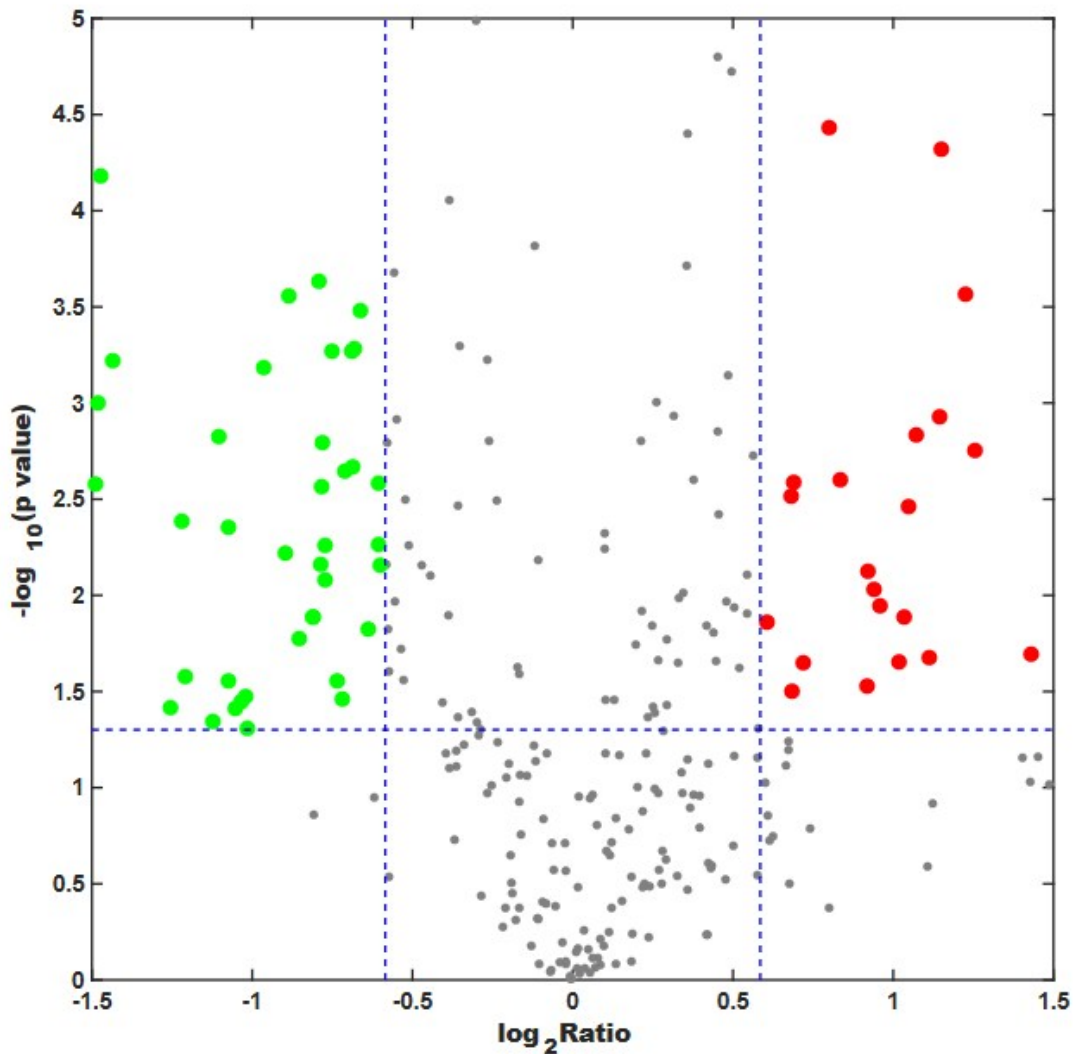

**Fig. S2.** The horizontal coordinates represent the proteins with a  $\log_2^{\text{Ratio}}$  (PQ intoxication/Control)  $>0.58$  or  $<-0.58$  (fold changes  $>1.5$  are shown in red and  $0.667$  are shown in green). The vertical axis is the  $-\log_{10}(\text{p-value}) >1.30$  (average  $p$ -value  $<0.05$ ) of differential expression proteins in two technical replicates. Every point represents an individual protein. (For interpretation of the references to colour in this figure legend, the reader is referred to the web version of this article.)

**Table S5.** The enriched pathways among the differentially expressed proteins

| Ingenuity Canonical Pathways                                          | -log(p-value) | Ratio  | Molecules                                                                                                              |
|-----------------------------------------------------------------------|---------------|--------|------------------------------------------------------------------------------------------------------------------------|
| LXR/RXR Activation                                                    | 28.3          | 0.174  | TTR,APOF,APOC4,APOA2,APOC2,NFKB1,SERPINF2,APOL1,ALB,APOA1,TF,ORM1,SAA1,APOC1,ORM2,ACACA,SERPINA1,S100A8,LBP,APOD,APOC3 |
| FXR/RXR Activation                                                    | 21            | 0.136  | TTR,APOF,APOC4,APOA2,APOC2,SERPINF2,APOL1,ALB,APOA1,TF,ORM1,SAA1,APOC1,ORM2,SERPINA1,APOD,APOC3                        |
| Atherosclerosis Signaling                                             | 19.3          | 0.129  | VCAM1,APOF,APOC4,APOA2,APOC2,NFKB1,APOL1,ALB,APOA1,ORM1,APOC1,ORM2,SERPINA1,S100A8,APOD,APOC3                          |
| Clathrin-mediated Endocytosis Signaling                               | 19            | 0.0909 | APOF,APOC4,ACTB,APOA2,APOC2,F2,APOL1,ALB,APOA1,TF,ORM1,APOC1,TFRC,ORM2,SERPINA1,S100A8,APOD,APOC3                      |
| Acute Phase Response Signaling                                        | 18.7          | 0.101  | TTR,C4BPB,APOA2,NFKB1,F2,SERPINF2,ALB,APOA1,TF,ORM1,C4BPA,SAA1,CRP,ORM2,SERPINA1,LBP,A2M                               |
| IL-12 Signaling and Production in Macrophages                         | 16.7          | 0.104  | APOF,APOC4,APOA2,APOC2,NFKB1,APOL1,ALB,APOA1,ORM1,APOC1,ORM2,S100A8,SERPINA1,APOD,APOC3                                |
| Production of Nitric Oxide and Reactive Oxygen Species in Macrophages | 16.2          | 0.0829 | APOF,APOC4,APOA2,APOC2,NFKB1,APOL1,ALB,MPO,APOA1,ORM1,APOC1,ORM2,SERPINA1,S100A8,APOD,APOC3                            |
| Coagulation System                                                    | 8.25          | 0.171  | F9,SERPINA5,SERPINA1,A2M,F2,SERPINF2                                                                                   |
| Complement System                                                     | 4.86          | 0.111  | C4BPB,C4BPA,C8A,C1QB                                                                                                   |
| Glycolysis I                                                          | 3.91          | 0.125  | PGK1,PKM,ALDOA                                                                                                         |
| Actin Cytoskeleton Signaling                                          | 3.54          | 0.0271 | PFN1,ACTB,LBP,VCL,TMSB10/TMSB4X,F2                                                                                     |
| Hepatic Fibrosis / Hepatic Stellate Cell Activation                   | 3.04          | 0.0273 | VCAM1,FLT4,LBP,NFKB1,A2M                                                                                               |
| Role of IL-17A in Psoriasis                                           | 2.91          | 0.154  | S100A9,S100A8                                                                                                          |
| IL-6 Signaling                                                        | 2.73          | 0.0312 | CRP,LBP,NFKB1,A2M                                                                                                      |
| Melatonin Degradation III                                             | 2.39          | 1      | MPO                                                                                                                    |
| Gluconeogenesis I                                                     | 2.33          | 0.08   | PGK1,ALDOA                                                                                                             |
| VEGF Signaling                                                        | 2.1           | 0.03   | ACTB,FLT4,VCL                                                                                                          |
| ILK Signaling                                                         | 2.1           | 0.0207 | ACTB,VCL,TMSB10/TMSB4X,NFKB1                                                                                           |
| L-cysteine                                                            | 2.09          | 0.5    | GOT1                                                                                                                   |

|                                              |      |        |                           |
|----------------------------------------------|------|--------|---------------------------|
| Degradation III                              |      |        |                           |
| IL-8 Signaling                               | 2.07 | 0.0204 | VCAM1,MPO,FLT4,NFKB1      |
| LPS/IL-1 Mediated Inhibition of RXR Function | 1.98 | 0.0191 | APOC4,APOC1,APOC2,LBP     |
| Integrin Signaling                           | 1.96 | 0.0189 | PFN1,ARF3,ACTB,VCL        |
| Glucocorticoid Receptor Signaling            | 1.92 | 0.0149 | VCAM1,ACTB,KRT1,NFKB1,A2M |
| Intrinsic Prothrombin Activation Pathway     | 1.92 | 0.0488 | F9,F2                     |
| Biotin-carboxyl Carrier Protein Assembly     | 1.91 | 0.333  | ACACA                     |
| Glutamate Degradation II                     | 1.91 | 0.333  | GOT1                      |
| Aspartate Biosynthesis                       | 1.91 | 0.333  | GOT1                      |
| iNOS Signaling                               | 1.86 | 0.0455 | LBP,NFKB1                 |
| Catecholamine Biosynthesis                   | 1.79 | 0.25   | DBH                       |
| L-cysteine Degradation I                     | 1.79 | 0.25   | GOT1                      |
| Pyruvate Fermentation to Lactate             | 1.69 | 0.2    | LDHA                      |
| Aspartate Degradation II                     | 1.55 | 0.143  | GOT1                      |
| Remodeling of Epithelial Adherens Junctions  | 1.53 | 0.0303 | ACTB,VCL                  |
| Tight Junction Signaling                     | 1.52 | 0.0181 | ACTB,VCL,NFKB1            |
| Lymphotoxin $\beta$ Receptor Signaling       | 1.51 | 0.0299 | VCAM1,NFKB1               |
| PPAR $\alpha$ /RXR $\alpha$ Activation       | 1.5  | 0.0179 | APOA1,APOA2,NFKB1         |
| Germ Cell-Sertoli Cell                       | 1.5  | 0.0178 | ACTB,VCL,A2M              |



|                                                            |      |        |                     |
|------------------------------------------------------------|------|--------|---------------------|
| Junction Signaling                                         |      |        |                     |
| Sucrose Degradation V (Mammalian)                          | 1.49 | 0.125  | ALDOA               |
| IL-10 Signaling                                            | 1.49 | 0.029  | LBP,NFKB1           |
| TREM1 Signaling                                            | 1.48 | 0.0286 | MPO,NFKB1           |
| Sertoli Cell-Sertoli Cell Junction Signaling               | 1.47 | 0.0173 | ACTB,VCL,A2M        |
| Caveolar-mediated Endocytosis Signaling                    | 1.47 | 0.0282 | ALB,ACTB            |
| Agranulocyte Adhesion and Diapedesis                       | 1.45 | 0.017  | VCAM1,ICAM2,ACTB    |
| Toll-like Receptor Signaling                               | 1.42 | 0.0267 | LBP,NFKB1           |
| IL-15 Signaling                                            | 1.41 | 0.0263 | VCAM1,NFKB1         |
| IL-17 Signaling                                            | 1.33 | 0.0235 | CRP,NFKB1           |
| Regulation of Actin-based Motility by Rho                  | 1.32 | 0.0233 | PFN1,ACTB           |
| LPS-stimulated MAPK Signaling                              | 1.31 | 0.023  | LBP,NFKB1           |
| VEGF Family Ligand-Receptor Interactions                   | 1.3  | 0.0227 | FLT4,NRP1           |
| Crosstalk between Dendritic Cells and Natural Killer Cells | 1.29 | 0.0225 | ACTB,NFKB1          |
| Leukocyte Extravasation Signaling                          | 1.28 | 0.0146 | VCAM1,ACTB,VCL      |
| Osteoarthritis Pathway                                     | 1.28 | 0.0146 | S100A9,S100A8,NFKB1 |
| Acute Myeloid Leukemia Signaling                           | 1.27 | 0.0217 | NFKB1,IDH1          |
| Death Receptor Signaling                                   | 1.27 | 0.0217 | ACTB,NFKB1          |

|                                                                              |       |        |                 |
|------------------------------------------------------------------------------|-------|--------|-----------------|
| Phenylalanine Degradation IV (Mammalian, via Side Chain)                     | 1.25  | 0.0714 | GOT1            |
| FAK Signaling                                                                | 1.22  | 0.0204 | ACTB,VCL        |
| Extrinsic Prothrombin Activation Pathway                                     | 1.2   | 0.0625 | F2              |
| Virus Entry via Endocytic Pathways                                           | 1.19  | 0.0196 | ACTB,TFRC       |
| Paxillin Signaling                                                           | 1.13  | 0.0182 | ACTB,VCL        |
| Inflammasome pathway                                                         | 1.11  | 0.05   | NFKB1           |
| PTEN Signaling                                                               | 1.07  | 0.0168 | FLT4,NFKB1      |
| RhoA Signaling                                                               | 1.05  | 0.0164 | PFN1,ACTB       |
| PI3K/AKT Signaling                                                           | 1.05  | 0.0163 | YWHAZ,NFKB1     |
| Role of JAK1, JAK2 and TYK2 in Interferon Signaling                          | 1.03  | 0.0417 | NFKB1           |
| IL-17A Signaling in Gastric Cells                                            | 1.01  | 0.04   | NFKB1           |
| Role of Pattern Recognition Receptors in Recognition of Bacteria and Viruses | 1     | 0.0153 | C1QB,NFKB1      |
| HMGB1 Signaling                                                              | 1     | 0.0153 | VCAM1,NFKB1     |
| p70S6K Signaling                                                             | 1     | 0.0153 | YWHAZ,F2        |
| Gα12/13 Signaling                                                            | 0.979 | 0.0148 | NFKB1,F2        |
| IL-15 Production                                                             | 0.966 | 0.0357 | NFKB1           |
| Sirtuin Signaling Pathway                                                    | 0.963 | 0.0106 | PGK1,LDHA,NFKB1 |
| TNFR2 Signaling                                                              | 0.952 | 0.0345 | NFKB1           |
| Epithelial Adherens Junction Signaling                                       | 0.937 | 0.014  | ACTB,VCL        |
| 4-1BB Signaling in T Lymphocytes                                             | 0.911 | 0.0312 | NFKB1           |

|                                                            |       |         |                 |
|------------------------------------------------------------|-------|---------|-----------------|
| Neuroinflammation Signaling Pathway                        | 0.904 | 0.00997 | VCAM1,CRP,NFKB1 |
| Type II Diabetes Mellitus Signaling                        | 0.894 | 0.0132  | PKM,NFKB1       |
| TWEAK Signaling                                            | 0.887 | 0.0294  | NFKB1           |
| MIF-mediated Glucocorticoid Regulation                     | 0.875 | 0.0286  | NFKB1           |
| IL-17A Signaling in Fibroblasts                            | 0.875 | 0.0286  | NFKB1           |
| Superpathway of Methionine Degradation                     | 0.875 | 0.0286  | GOT1            |
| Hepatic Cholestasis                                        | 0.867 | 0.0127  | LBP,NFKB1       |
| Inhibition of Matrix Metalloproteases                      | 0.842 | 0.0263  | A2M             |
| Granulocyte Adhesion and Diapedesis                        | 0.832 | 0.012   | VCAM1,ICAM2     |
| April Mediated Signaling                                   | 0.831 | 0.0256  | NFKB1           |
| Tec Kinase Signaling                                       | 0.824 | 0.0119  | ACTB,NFKB1      |
| Triacylglycerol Degradation                                | 0.821 | 0.025   | DAGLA           |
| Role of PKR in Interferon Induction and Antiviral Response | 0.811 | 0.0244  | NFKB1           |
| B Cell Activating Factor Signaling                         | 0.811 | 0.0244  | NFKB1           |
| Mechanisms of Viral Exit from Host Cells                   | 0.811 | 0.0244  | ACTB            |
| Role of RIG1-like Receptors in Antiviral Innate Immunity   | 0.802 | 0.0238  | NFKB1           |
| Role of IL-17F in Allergic                                 | 0.802 | 0.0238  | NFKB1           |

|                                                              |       |         |            |
|--------------------------------------------------------------|-------|---------|------------|
| Inflammatory Airway Diseases                                 |       |         |            |
| MIF Regulation of Innate Immunity                            | 0.792 | 0.0233  | NFKB1      |
| NF-κB Signaling                                              | 0.785 | 0.0112  | FLT4,NFKB1 |
| IL-9 Signaling                                               | 0.774 | 0.0222  | NFKB1      |
| RAR Activation                                               | 0.752 | 0.0107  | ACTB,NFKB1 |
| TNFR1 Signaling                                              | 0.749 | 0.0208  | NFKB1      |
| Cell Cycle: G2/M DNA Damage Checkpoint Regulation            | 0.741 | 0.0204  | YWHAZ      |
| Cancer Drug Resistance By Drug Efflux                        | 0.741 | 0.0204  | NFKB1      |
| CD27 Signaling in Lymphocytes                                | 0.718 | 0.0192  | NFKB1      |
| Semaphorin Signaling in Neurons                              | 0.718 | 0.0192  | NRP1       |
| Thrombin Signaling                                           | 0.704 | 0.00995 | NFKB1,F2   |
| Regulation of Cellular Mechanics by Calpain Protease         | 0.696 | 0.0182  | VCL        |
| OX40 Signaling Pathway                                       | 0.689 | 0.0179  | NFKB1      |
| Induction of Apoptosis by HIV1                               | 0.662 | 0.0167  | NFKB1      |
| PCP pathway                                                  | 0.662 | 0.0167  | PFN1       |
| AMPK Signaling                                               | 0.66  | 0.0093  | ACTB,ACACA |
| Activation of IRF by Cytosolic Pattern Recognition Receptors | 0.656 | 0.0164  | NFKB1      |
| Superpathway of Melatonin Degradation                        | 0.656 | 0.0164  | MPO        |
| Wnt/Ca+ pathway                                              | 0.65  | 0.0161  | NFKB1      |

|                                                                      |       |         |            |
|----------------------------------------------------------------------|-------|---------|------------|
| ERK5 Signaling                                                       | 0.626 | 0.0152  | YWHAZ      |
| Agrin Interactions at Neuromuscular Junction                         | 0.62  | 0.0149  | ACTB       |
| Role of IL-17A in Arthritis                                          | 0.609 | 0.0145  | NFKB1      |
| Myc Mediated Apoptosis Signaling                                     | 0.604 | 0.0143  | YWHAZ      |
| MSP-RON Signaling Pathway                                            | 0.593 | 0.0139  | ACTB       |
| Hypoxia Signaling in the Cardiovascular System                       | 0.588 | 0.0137  | LDHA       |
| STAT3 Pathway                                                        | 0.583 | 0.0135  | FLT4       |
| BMP signaling pathway                                                | 0.583 | 0.0135  | NFKB1      |
| Role of PI3K/AKT Signaling in the Pathogenesis of Influenza          | 0.573 | 0.0132  | NFKB1      |
| Angiopoietin Signaling                                               | 0.568 | 0.013   | NFKB1      |
| Signaling by Rho Family GTPases                                      | 0.564 | 0.00797 | ACTB,NFKB1 |
| CD40 Signaling                                                       | 0.563 | 0.0128  | NFKB1      |
| IL-17A Signaling in Airway Cells                                     | 0.563 | 0.0128  | NFKB1      |
| Estrogen-Dependent Breast Cancer Signaling                           | 0.559 | 0.0127  | NFKB1      |
| Regulation of IL-2 Expression in Activated and Anergic T Lymphocytes | 0.559 | 0.0127  | NFKB1      |
| Role of BRCA1 in DNA Damage                                          | 0.554 | 0.0125  | ACTB       |

|                                                                 |       |         |             |
|-----------------------------------------------------------------|-------|---------|-------------|
| Response                                                        |       |         |             |
| Erythropoietin Signaling                                        | 0.549 | 0.0123  | NFKB1       |
| Altered T Cell and B Cell Signaling in Rheumatoid Arthritis     | 0.54  | 0.012   | NFKB1       |
| JAK/Stat Signaling                                              | 0.54  | 0.012   | NFKB1       |
| Growth Hormone Signaling                                        | 0.532 | 0.0118  | A2M         |
| Small Cell Lung Cancer Signaling                                | 0.532 | 0.0118  | NFKB1       |
| HIPPO signaling                                                 | 0.528 | 0.0116  | YWHAZ       |
| NF-κB Activation by Viruses                                     | 0.523 | 0.0115  | NFKB1       |
| PEDF Signaling                                                  | 0.523 | 0.0115  | NFKB1       |
| Apoptosis Signaling                                             | 0.515 | 0.0112  | NFKB1       |
| IL-1 Signaling                                                  | 0.503 | 0.0109  | NFKB1       |
| PPAR Signaling                                                  | 0.503 | 0.0109  | NFKB1       |
| Ceramide Signaling                                              | 0.499 | 0.0108  | NFKB1       |
| Fcγ Receptor-mediated Phagocytosis in Macrophages and Monocytes | 0.499 | 0.0108  | ACTB        |
| Prostate Cancer Signaling                                       | 0.492 | 0.0105  | NFKB1       |
| Sumoylation Pathway                                             | 0.488 | 0.0104  | NFKB1       |
| TR/RXR Activation                                               | 0.481 | 0.0102  | ACACA       |
| RANK Signaling in Osteoclasts                                   | 0.474 | 0.01    | NFKB1       |
| Antioxidant Action of Vitamin C                                 | 0.46  | 0.00962 | NFKB1       |
| Chronic Myeloid Leukemia Signaling                              | 0.456 | 0.00952 | NFKB1       |
| Role of Macrophages,                                            | 0.455 | 0.0066  | VCAM1,NFKB1 |

|                                                           |       |         |       |
|-----------------------------------------------------------|-------|---------|-------|
| Fibroblasts and Endothelial Cells in Rheumatoid Arthritis |       |         |       |
| IGF-1 Signaling                                           | 0.453 | 0.00943 | YWHAZ |
| Type I Diabetes Mellitus Signaling                        | 0.45  | 0.00935 | NFKB1 |
| Nitric Oxide Signaling in the Cardiovascular System       | 0.447 | 0.00926 | FLT4  |
| T Cell Receptor Signaling                                 | 0.447 | 0.00926 | NFKB1 |
| Glioma Signaling                                          | 0.431 | 0.00885 | IDH1  |
| HIF1 $\alpha$ Signaling                                   | 0.422 | 0.00862 | LDHA  |
| Rac Signaling                                             | 0.422 | 0.00862 | NFKB1 |
| iCOS-iCOSL Signaling in T Helper Cells                    | 0.416 | 0.00847 | NFKB1 |
| Pancreatic Adenocarcinoma Signaling                       | 0.411 | 0.00833 | NFKB1 |
| Role of Tissue Factor in Cancer                           | 0.411 | 0.00833 | F2    |
| NGF Signaling                                             | 0.411 | 0.00833 | NFKB1 |
| Renin-Angiotensin Signaling                               | 0.408 | 0.00826 | NFKB1 |
| fMLP Signaling in Neutrophils                             | 0.405 | 0.0082  | NFKB1 |
| Cellular Effects of Sildenafil (Viagra)                   | 0.394 | 0.00794 | ACTB  |
| PI3K Signaling in B Lymphocytes                           | 0.394 | 0.00794 | NFKB1 |
| CD28 Signaling in T Helper Cells                          | 0.392 | 0.00787 | NFKB1 |
| 14-3-3-mediated Signaling                                 | 0.384 | 0.00769 | YWHAZ |
| Th1 Pathway                                               | 0.384 | 0.00769 | NFKB1 |
| P2Y Purigenic Receptor Signaling                          | 0.376 | 0.00752 | NFKB1 |

|                                                             |       |         |             |
|-------------------------------------------------------------|-------|---------|-------------|
| Pathway                                                     |       |         |             |
| Corticotropin Releasing Hormone Signaling                   | 0.372 | 0.00741 | KRT1        |
| Aryl Hydrocarbon Receptor Signaling                         | 0.369 | 0.00735 | NFKB1       |
| Androgen Signaling                                          | 0.369 | 0.00735 | NFKB1       |
| Phagosome Maturation                                        | 0.364 | 0.00725 | MPO         |
| Hereditary Breast Cancer Signaling                          | 0.357 | 0.00709 | ACTB        |
| Th2 Pathway                                                 | 0.346 | 0.00685 | NFKB1       |
| Protein Kinase A Signaling                                  | 0.332 | 0.00521 | YWHAZ,NFKB1 |
| Relaxin Signaling                                           | 0.33  | 0.00649 | NFKB1       |
| PKC $\theta$ Signaling in T Lymphocytes                     | 0.33  | 0.00649 | NFKB1       |
| G $\alpha$ q Signaling                                      | 0.32  | 0.00629 | NFKB1       |
| GNRH Signaling                                              | 0.314 | 0.00617 | NFKB1       |
| eNOS Signaling                                              | 0.308 | 0.00606 | FLT4        |
| RhoGDI Signaling                                            | 0.289 | 0.00568 | ACTB        |
| Th1 and Th2 Activation Pathway                              | 0.282 | 0.00556 | NFKB1       |
| Role of NFAT in Regulation of the Immune Response           | 0.28  | 0.00552 | NFKB1       |
| Dendritic Cell Maturation                                   | 0.274 | 0.00541 | NFKB1       |
| Regulation of the Epithelial-Mesenchymal Transition Pathway | 0.271 | 0.00535 | NFKB1       |
| B Cell Receptor Signaling                                   | 0.269 | 0.00532 | NFKB1       |
| NRF2-mediated Oxidative Stress Response                     | 0.266 | 0.00526 | ACTB        |



|                                                                           |       |         |           |
|---------------------------------------------------------------------------|-------|---------|-----------|
| Gap Junction Signaling                                                    | 0.265 | 0.00524 | ACTB      |
| Axonal Guidance Signaling                                                 | 0.264 | 0.00449 | PFN1,NRP1 |
| Calcium Signaling                                                         | 0.255 | 0.00505 | TPM4      |
| ERK/MAPK Signaling                                                        | 0.253 | 0.00503 | YWHAZ     |
| EIF2 Signaling                                                            | 0.236 | 0.00472 | ACTB      |
| Systemic Lupus Erythematosus Signaling                                    | 0.229 | 0.00461 | C8A       |
| Role of Osteoblasts, Osteoclasts and Chondrocytes in Rheumatoid Arthritis | 0.216 | 0.00439 | NFKB1     |
| Phospholipase C Signaling                                                 | 0.208 | 0.00426 | NFKB1     |
| Opioid Signaling Pathway                                                  | 0.206 | 0.00422 | NFKB1     |
| Colorectal Cancer Metastasis Signaling                                    | 0.199 | 0.00412 | NFKB1     |

**Table S6.** The highest scoring IPA network among the differentially expressed proteins

| Symbol         | Entrez Gene Name                   | UniProt Accession | Expr Log Ratio | Location            | Family                  | Biomarker Application(s)                                                             |
|----------------|------------------------------------|-------------------|----------------|---------------------|-------------------------|--------------------------------------------------------------------------------------|
| A2M            | alpha-2-macroglobulin              | P01023            | -1.48211       | Extracellular Space | transporter             |                                                                                      |
| APOA1          | apolipoprotein A1                  | P02647            | -1.72634       | Extracellular Space | transporter             | diagnosis, efficacy, unspecified application                                         |
| APOA2          | apolipoprotein A2                  | P02652            | -1.43576       | Extracellular Space | transporter             | efficacy                                                                             |
| APOC2          | apolipoprotein C2                  | P02655            | -0.79234       | Extracellular Space | transporter             | efficacy                                                                             |
| APOC3          | apolipoprotein C3                  | P02656            | -0.71175       | Extracellular Space | transporter             | diagnosis, efficacy                                                                  |
| APOD           | apolipoprotein D                   | P05090            | -1.54837       | Extracellular Space | transporter             | safety                                                                               |
| APOF           | apolipoprotein F                   | Q13790            | -0.81114       | Extracellular Space | transporter             |                                                                                      |
| APOL1          | apolipoprotein L1                  | O14791            | -0.63721       | Extracellular Space | transporter             |                                                                                      |
| CFHR1          | complement factor H related 1      | Q03591            | 0.605943       | Extracellular Space | other                   |                                                                                      |
| CRP            | C-reactive protein                 | P02741            | 1.143304       | Extracellular Space | other                   | diagnosis, disease progression, efficacy, prognosis, safety, unspecified application |
| DBH            | dopamine beta-hydroxylase          | P09172            | -0.6882        | Cytoplasm           | enzyme                  |                                                                                      |
| F2             | coagulation factor II, thrombin    | P00734            | 1.046538       | Extracellular Space | peptidase               | diagnosis, unspecified application                                                   |
| FCN2           | ficolin 2                          | Q15485            | -0.6872        | Extracellular Space | peptidase               | efficacy                                                                             |
| Fibrinogen     | --                                 | --                | --             | Plasma Membrane     | complex                 | diagnosis, disease progression, efficacy, prognosis, safety                          |
| IL1            | --                                 | --                | --             | Extracellular Space | group                   | diagnosis, efficacy, prognosis, response to therapy                                  |
| Jnk            | --                                 | --                | --             | Cytoplasm           | group                   |                                                                                      |
| LBP            | lipopolysaccharide binding protein | P18428            | 1.150616       | Plasma Membrane     | transporter             | diagnosis, efficacy                                                                  |
| LDL            | --                                 | --                | --             | Plasma Membrane     | complex                 | efficacy, unspecified application                                                    |
| LTF            | lactotransferrin                   | P02788            | 0.800676       | Extracellular Space | peptidase               | efficacy, unspecified application                                                    |
| MPO            | myeloperoxidase                    | P05164            | 1.428841       | Cytoplasm           | enzyme                  | diagnosis, efficacy, unspecified application                                         |
| NFkB (complex) | --                                 | --                | --             | Nucleus             | complex                 | diagnosis, disease progression, efficacy, prognosis                                  |
| NFKB1          | nuclear factor kappa B subunit 1   | P19838            | -1.07519       | Nucleus             | transcription regulator |                                                                                      |
| P38 MAPK       | --                                 | --                | --             | Cytoplasm           | group                   |                                                                                      |

|              |                                   |        |          |                     |                        |                                                                                                   |
|--------------|-----------------------------------|--------|----------|---------------------|------------------------|---------------------------------------------------------------------------------------------------|
| S100A8       | S100 calcium binding protein A8   | P05109 | 0.938674 | Cytoplasm           | other                  | diagnosis, efficacy, unspecified application                                                      |
| SAA1         | serum amyloid A1                  | P0DJ18 | -1.65251 | Extracellular Space | transporter            | diagnosis, unspecified application                                                                |
| SERPINA1     | serpin family A member 1          | P01009 | -1.72803 | Extracellular Space | other                  | diagnosis, unspecified application                                                                |
| SERPINA5     | serpin family A member 5          | P05154 | -2.17098 | Extracellular Space | other                  | diagnosis                                                                                         |
| SRC (family) | --                                | --     | --       | Cytoplasm           | group                  |                                                                                                   |
| TCF          | --                                | --     | --       | Other               | group                  |                                                                                                   |
| TCR          | --                                | --     | --       | Plasma Membrane     | complex                |                                                                                                   |
| TF           | transferrin                       | P02787 | -1.59683 | Extracellular Space | transporter            | efficacy, prognosis, safety, unspecified application                                              |
| TFRC         | transferrin receptor              | P02786 | -0.81163 | Plasma Membrane     | transporter            | diagnosis, efficacy                                                                               |
| VCAM1        | vascular cell adhesion molecule 1 | P19320 | -0.6009  | Plasma Membrane     | transmembrane receptor | diagnosis, disease progression, efficacy, prognosis, unspecified application                      |
| VCL          | vinculin                          | P18206 | 1.685397 | Plasma Membrane     | enzyme                 | unspecified application                                                                           |
| VEGF         | --                                | --     | --       | Extracellular Space | group                  | diagnosis, disease progression, efficacy, prognosis, response to therapy, unspecified application |

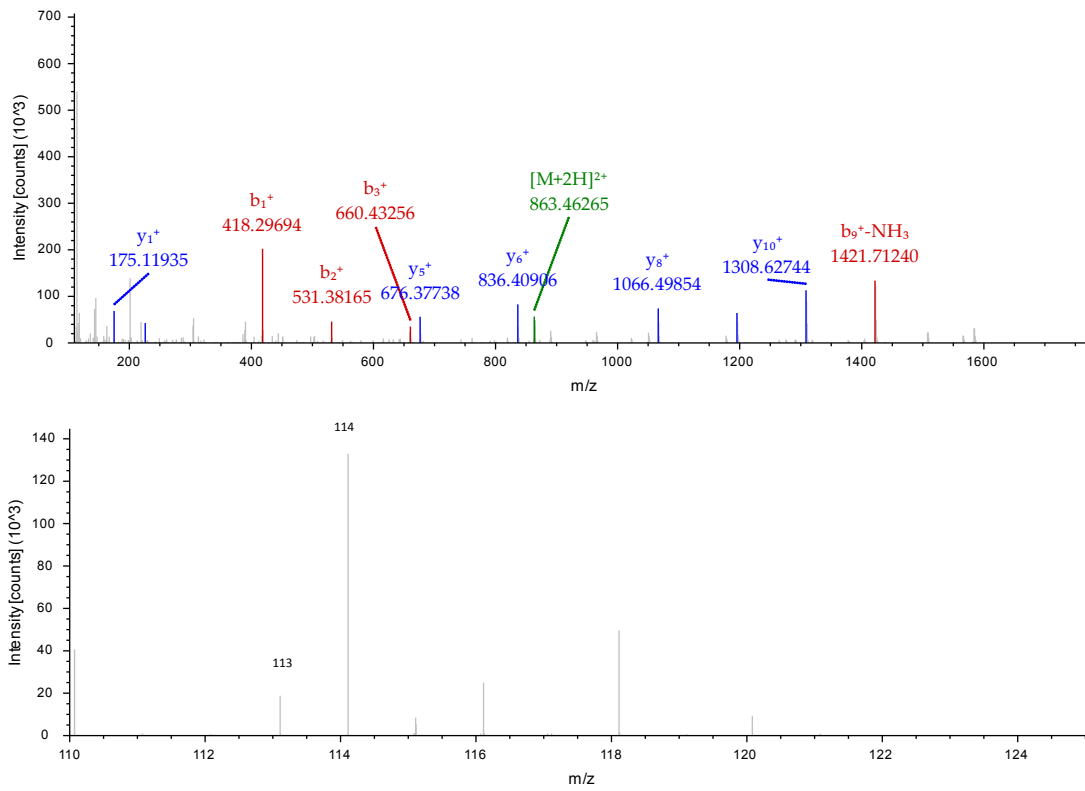

**Fig. S3** Examples of MS/MS spectra of a 2.01-fold up-regulated protein—S100-A8, illustrating the degree of relative quantitative measurement is consistency. Healthy control and PQ poisoning patients were labeled with 113- and 114- reporter isobaric reagent respectively. The MS/MS spectra of a peptide- LLETECPQYIR with m/z of 863.46 Da ( $z = 2$ ), related b ion and y ion were shown.

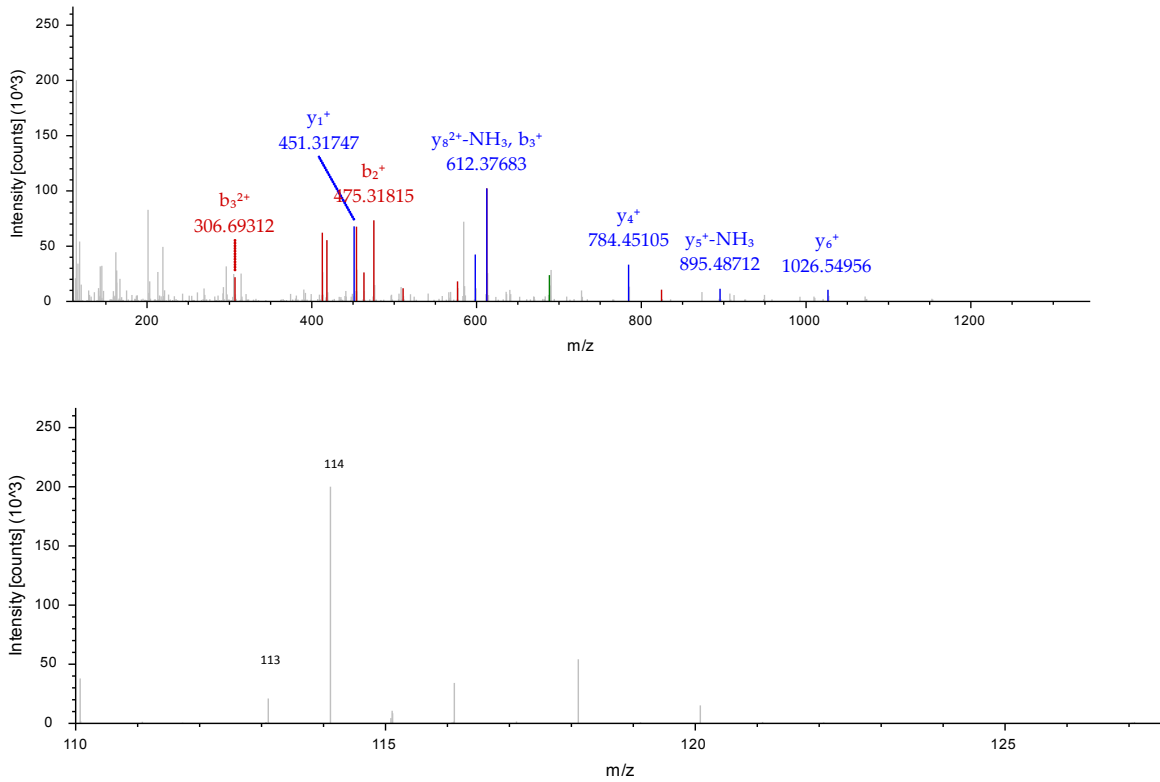

**Fig. S4** Examples of MS/MS spectra of a 2.25-fold up-regulated protein—S100-A9, illustrating the degree of relative quantitative measurement is consistency. Healthy control and PQ poisoning patients were labeled with 113- and 114- reporter isobaric reagent respectively. The MS/MS spectra of a peptide- LTWASHEK with m/z of 527.30 Da Da ( $z = 3$ ), related b ion and y ion were shown.

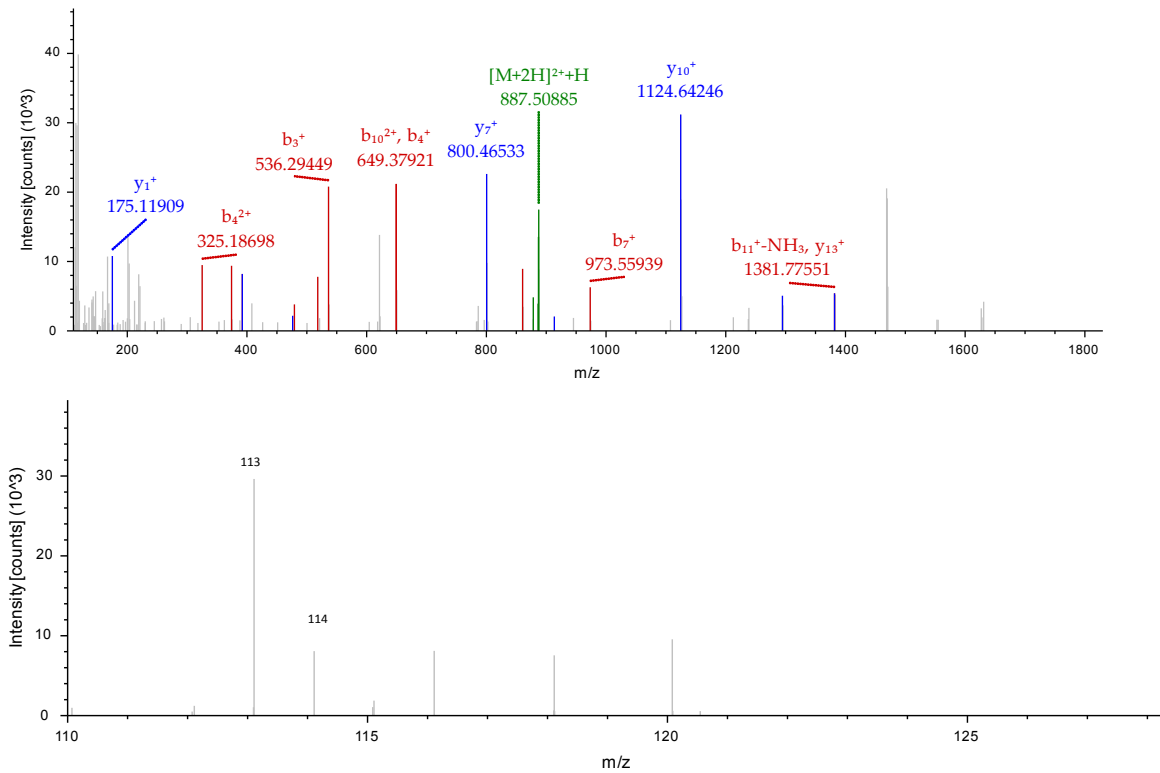

**Fig. S5** Examples of MS/MS spectra of a 0.52-fold up-regulated protein—TfR1, illustrating the degree of relative quantitative measurement is consistency. Healthy control and PQ poisoning patients were labeled with 113- and 114- reporter isobaric reagent respectively. The MS/MS spectra of a peptide- SGLPNIPVQTISR with m/z of 887.01 Da Da ( $z = 2$ ), related b ion and y ion were shown.

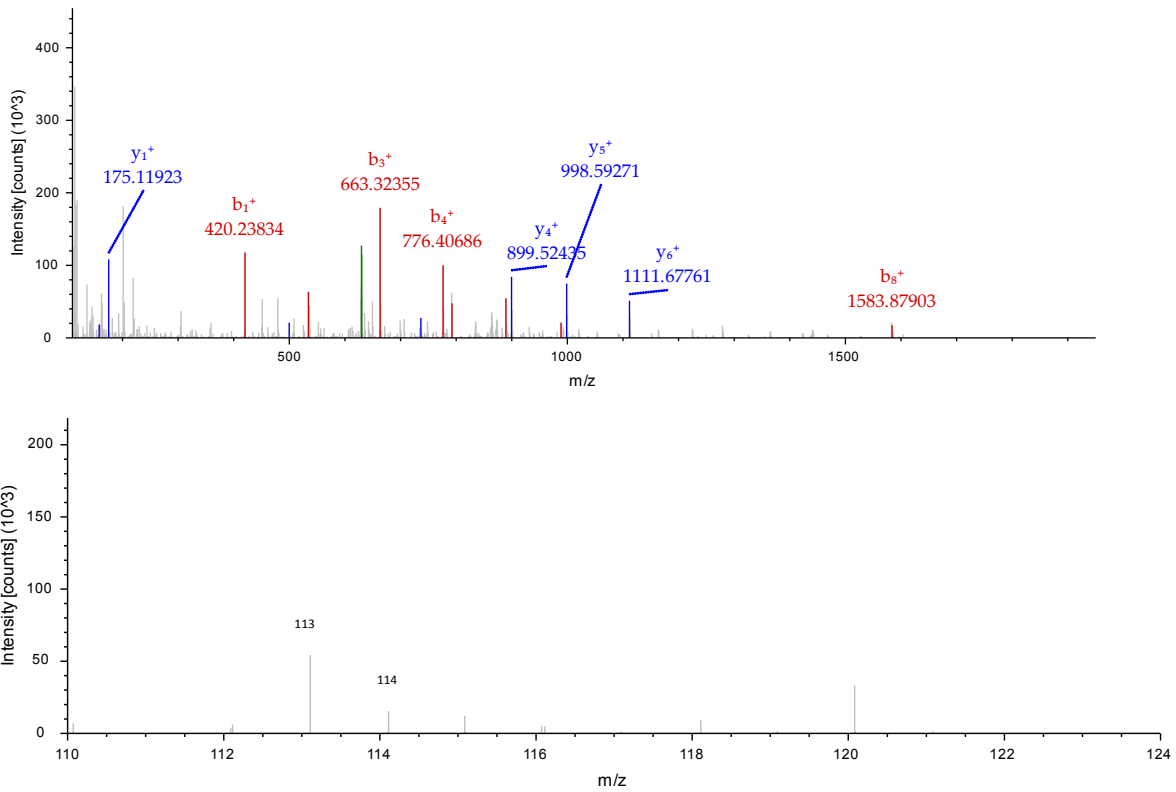

**Fig. S6** Examples of MS/MS spectra of a 0.51-fold up-regulated protein—SAP, illustrating the degree of relative quantitative measurement is consistency. Healthy control and PQ poisoning patients were labeled with 113- and 114- reporter isobaric reagent respectively. The MS/MS spectra of a peptide- DNELLVYKER with m/z of 629.69 Da (z = 3), related b ion and y ion were shown.

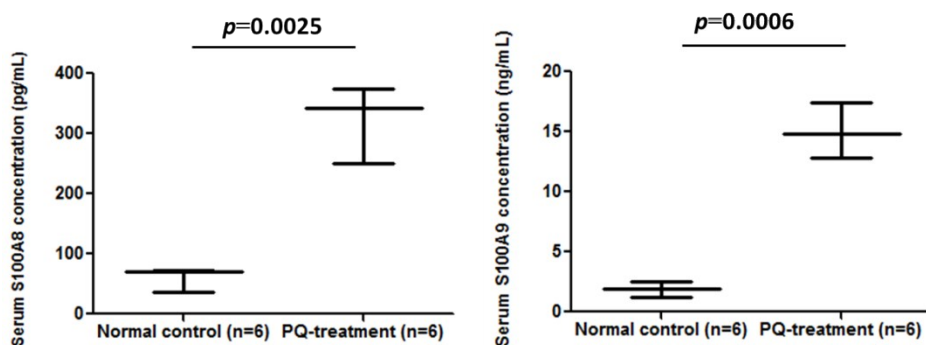

**Fig. S7** Serum levels of S100A8 and S100A9 in murine model (n=6) with normal control and PQ-treatment, respectively. (a) serum S100A8 is increased in PQ-treatment murine models compared with normal controls (normal 59.6±11.7 pg/mL versus PQ-treatment 321.7±37.2 pg/mL,  $p=0.0025$ ). (b) serum S100A9 is increased in PQ-treatment murine models compared with normal controls (normal 1.88±0.37 ng/mL versus PQ-treatment 15.0±1.31 ng/mL,  $p=0.0006$ ).

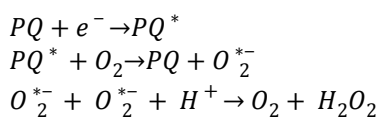

**Fig. S8** Proposed mechanism for  $H_2O_2$  production by paraquat (PQ) (cited from *J Biol Chem* 282, 14186-14193 (2007)).
